# Supplementary material for: Immune Checkpoint PD-1/PD-L1 CTLA-4/CD80 are Blocked by Rhus verniciflua Stokes and its Active Compounds
Source: PubMed Central journal article supplement (PMC6891444; doi:10.3390/molecules24224062), 2019-11-09
Supplement: molecules-24-04062-s001.pdf [file molecules-24-04062-s001.pdf]

## Supplementary Material

### **Immune Checkpoint PD-1/PD-L1 CTLA-4/CD80 are Blocked by *Rhus verniciflua* Stokes and its Active Compounds**

**Wei Li,<sup>1,#</sup> Tae In Kim,<sup>1,#</sup> Ji Hye Kim,<sup>1</sup> and Hwan-Suck Chung<sup>1,\*</sup>**

<sup>1</sup> Korean medicine (KM)-Application Center, Korea Institute of Oriental Medicine (KIOM), Daegu 41062, Republic of Korea; hschung@kiom.re.kr (H.S.C); liwei1986@kiom.re.kr (W.L.) ; tikim@kiom.re.kr (T.I.K) ; jkim2903@kiom.re.kr (J.H.K)

<sup>#</sup> These authors contributed equally to this work.

\* Correspondence: hschung@kiom.re.kr (H.S.C); Tel: (+82) 53 940 3875; Fax: (+82) 53 940 3899

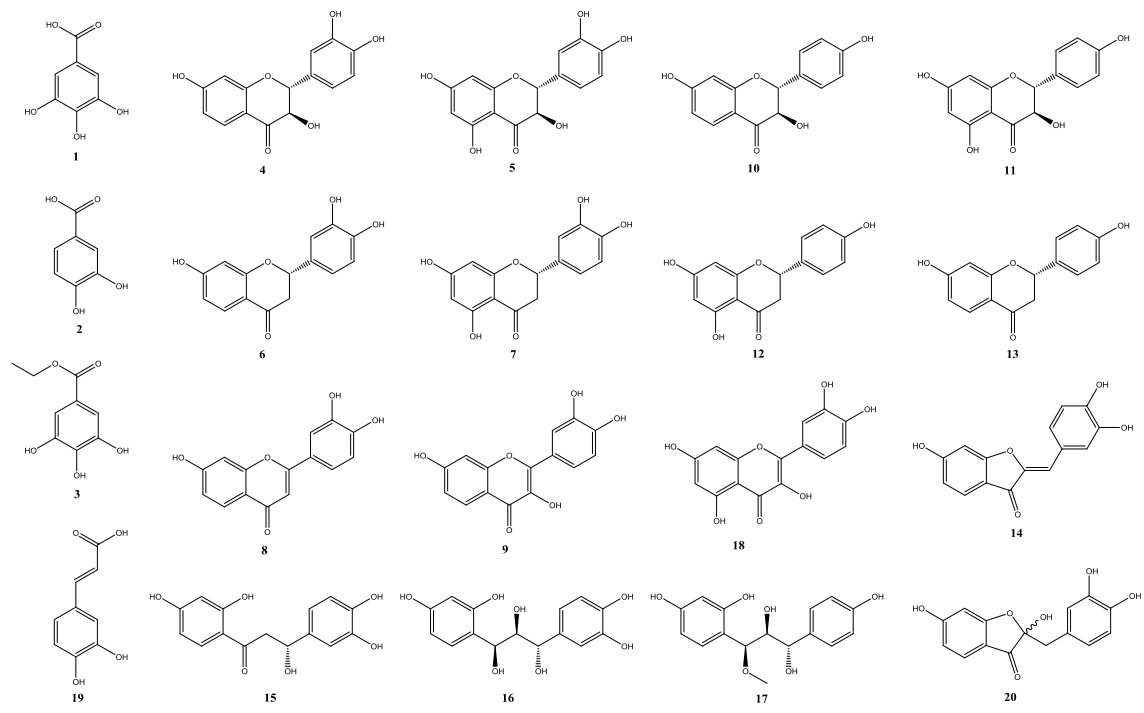

**S1.** Structures of compounds 1–20 from RVS.

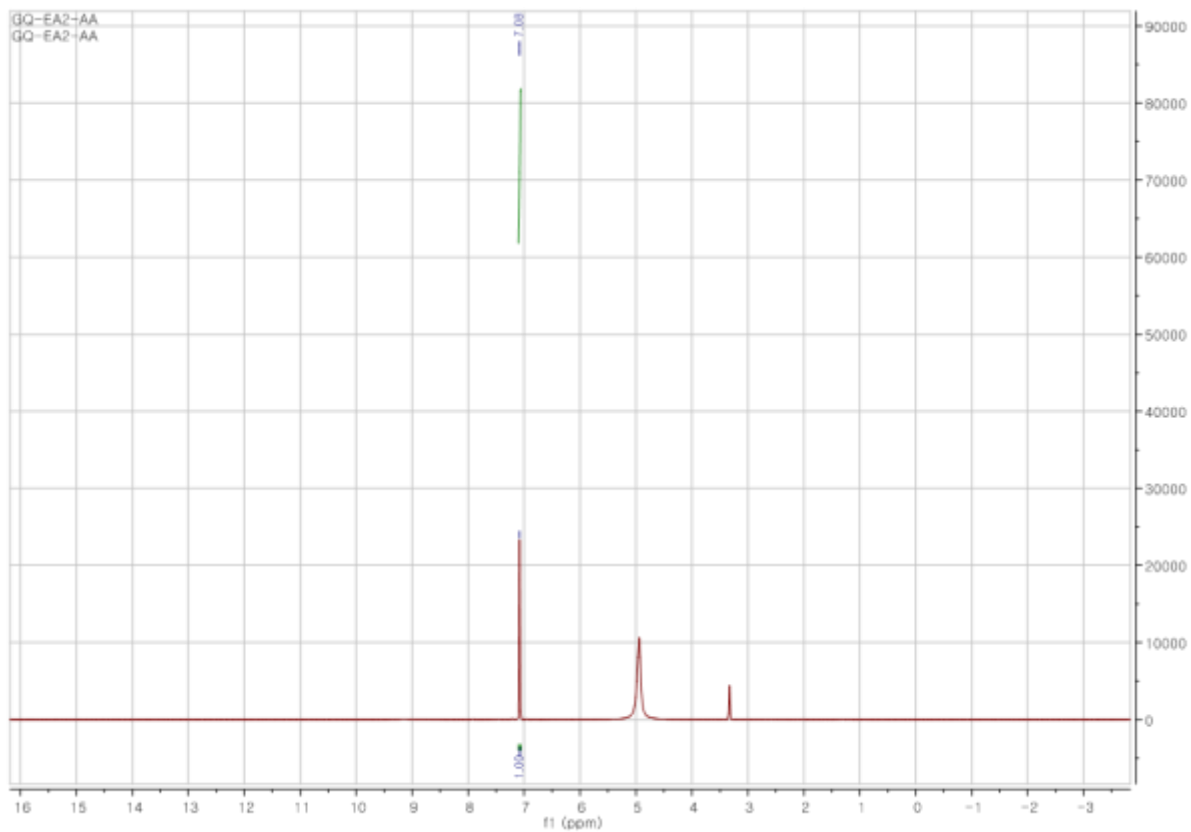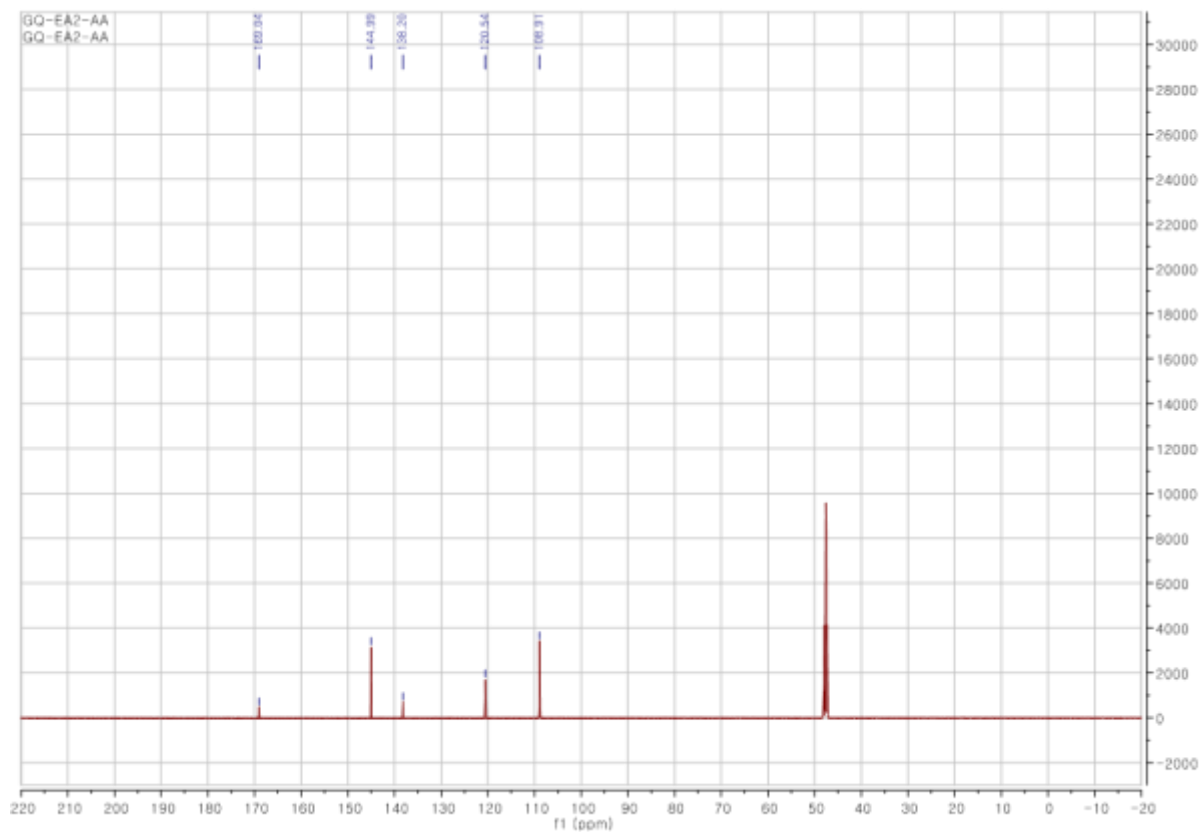

**S2.** <sup>1</sup>H and <sup>13</sup>C NMR spectrum of compound **1** in methanol-*d*<sub>4</sub> (600 and 150 MHz)

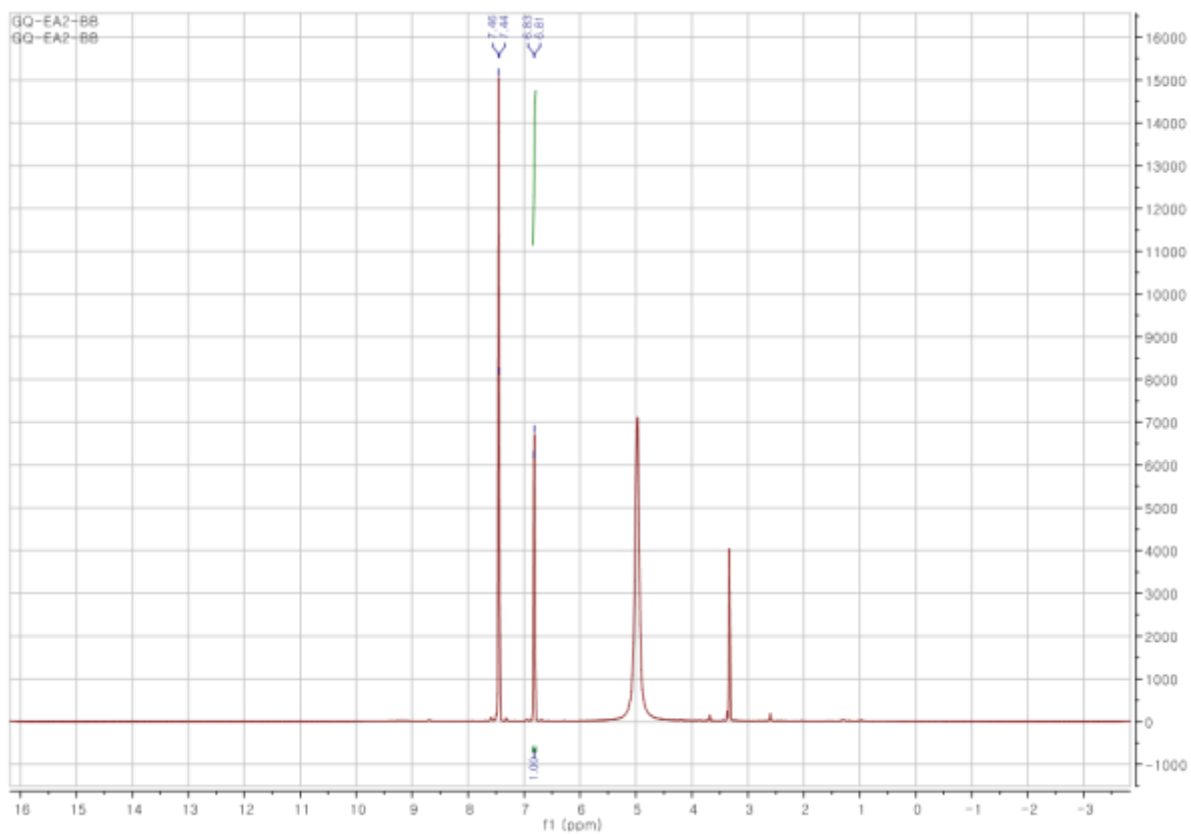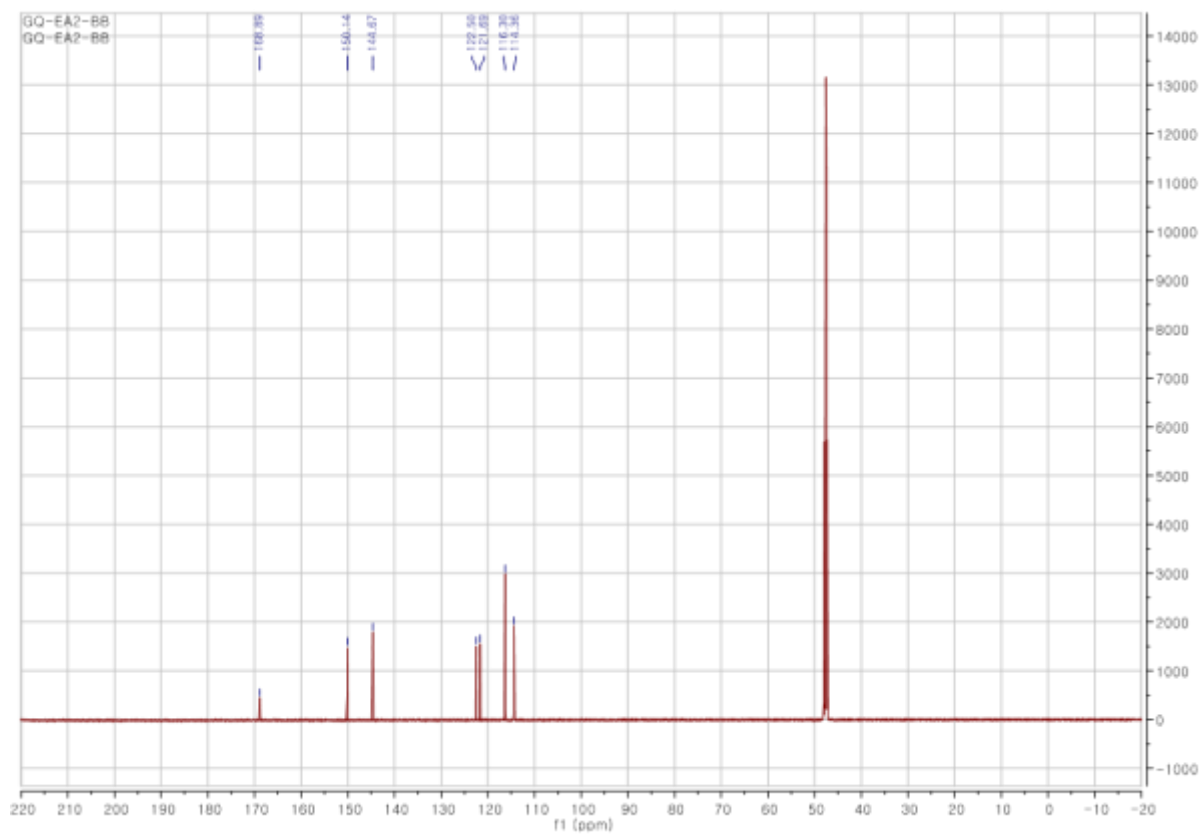

**S3.**  $^1\text{H}$  and  $^{13}\text{C}$  NMR spectrum of compound **2** in methanol- $d_4$  (600 and 150 MHz)

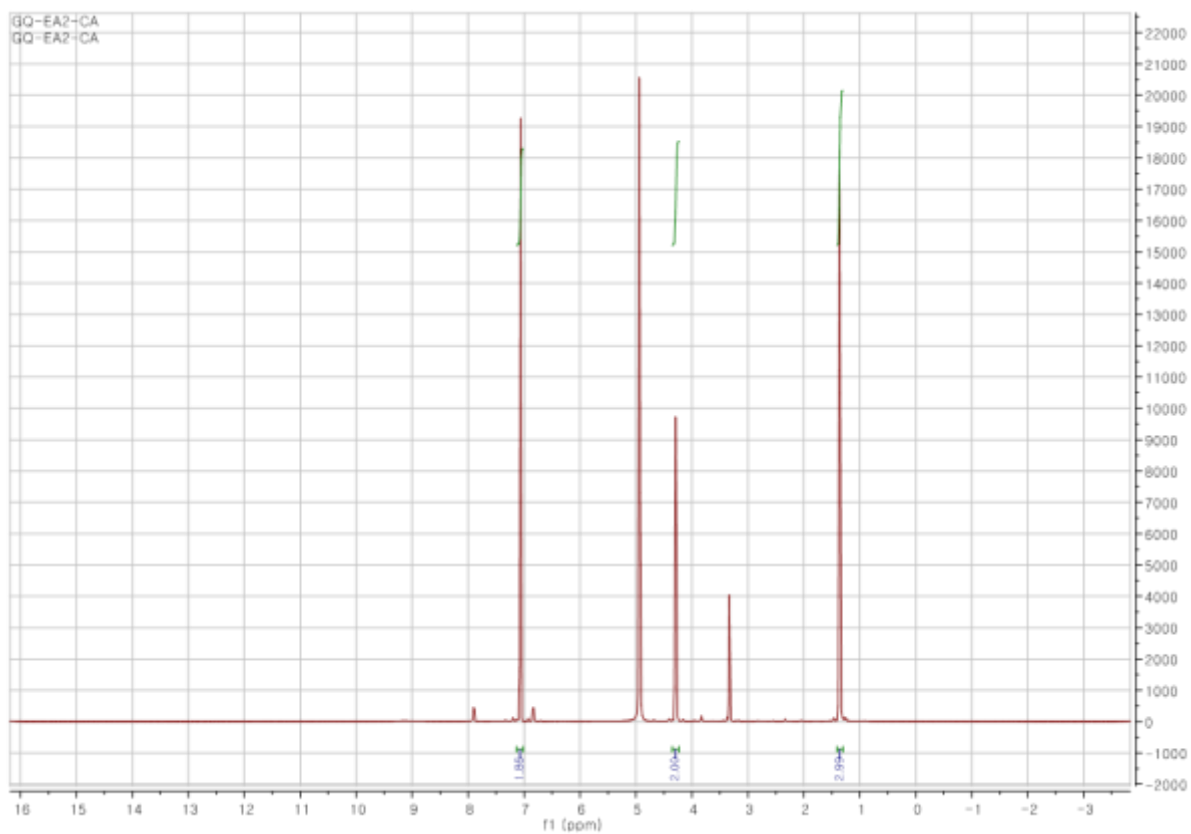

**S4.**  $^1\text{H}$  and  $^{13}\text{C}$  NMR spectrum of compound **3** in methanol- $d_4$  (600 and 150 MHz)

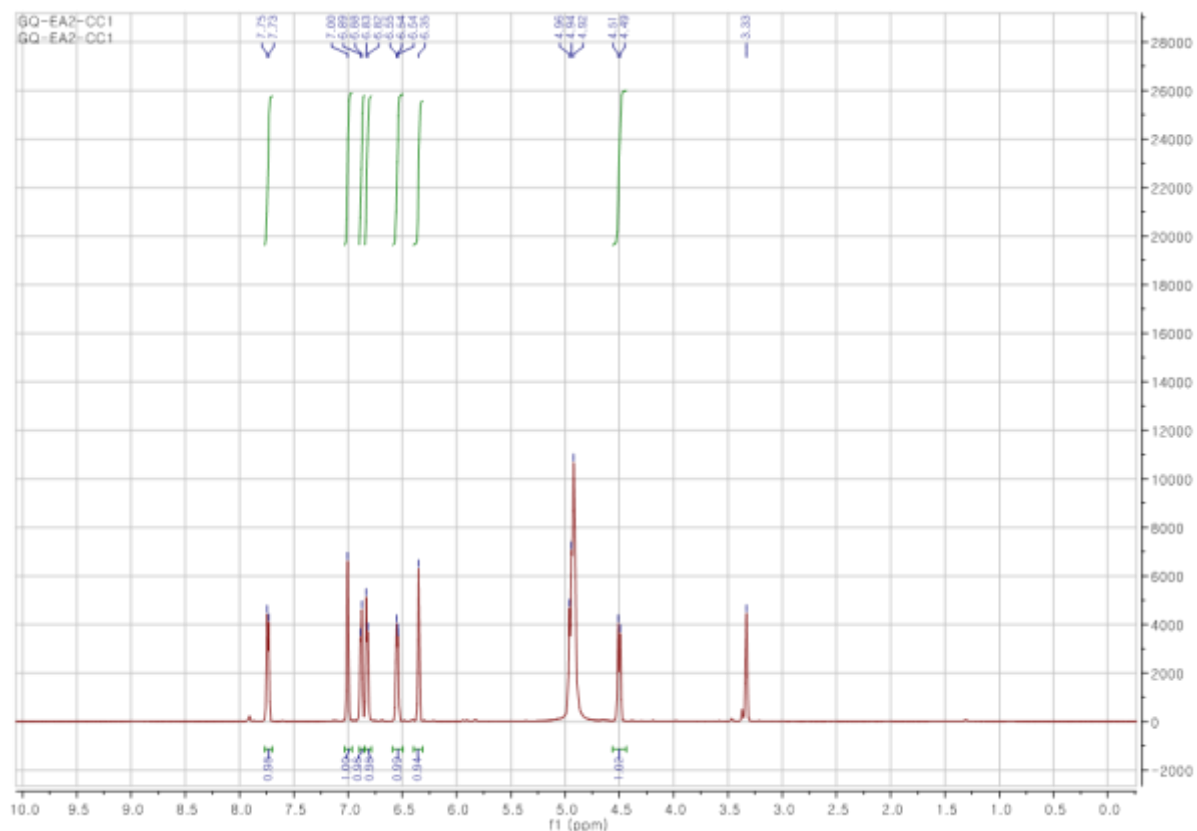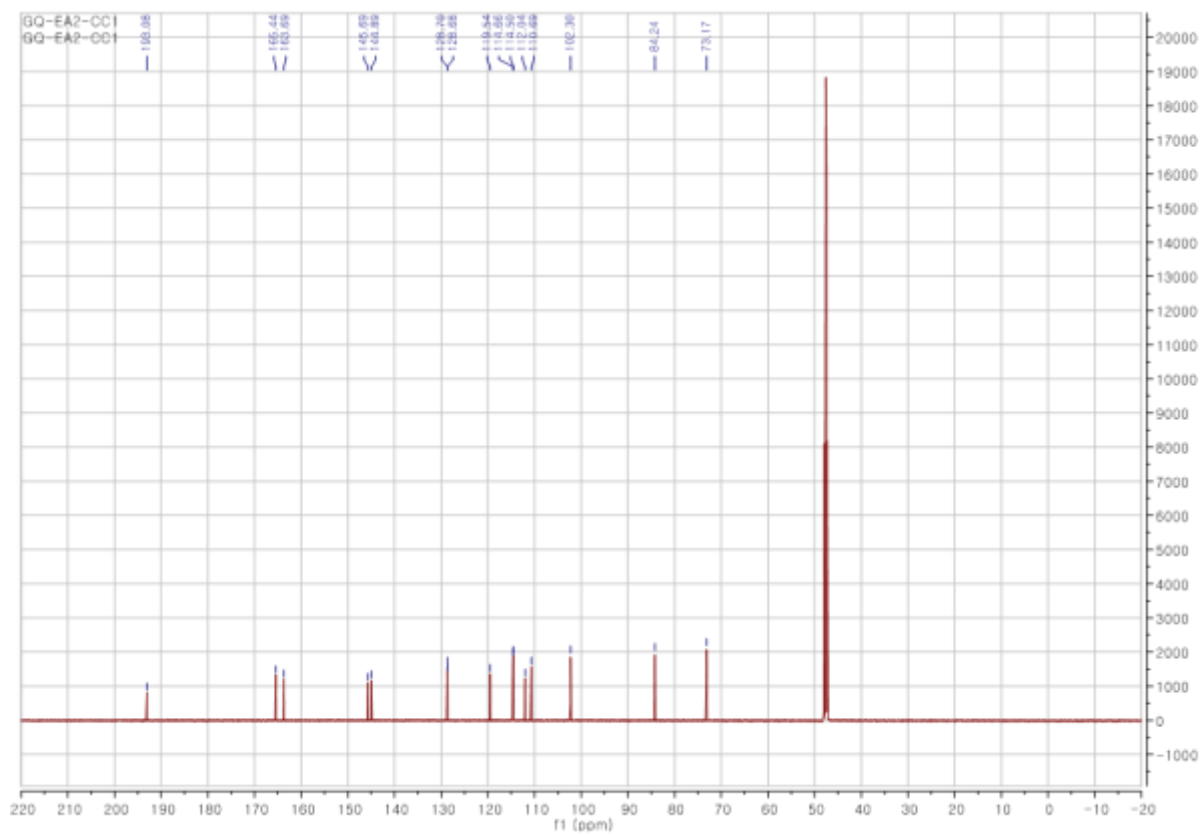

S5.  $^1\text{H}$  and  $^{13}\text{C}$  NMR spectrum of compound **4** in methanol- $d_4$  (600 and 150 MHz)

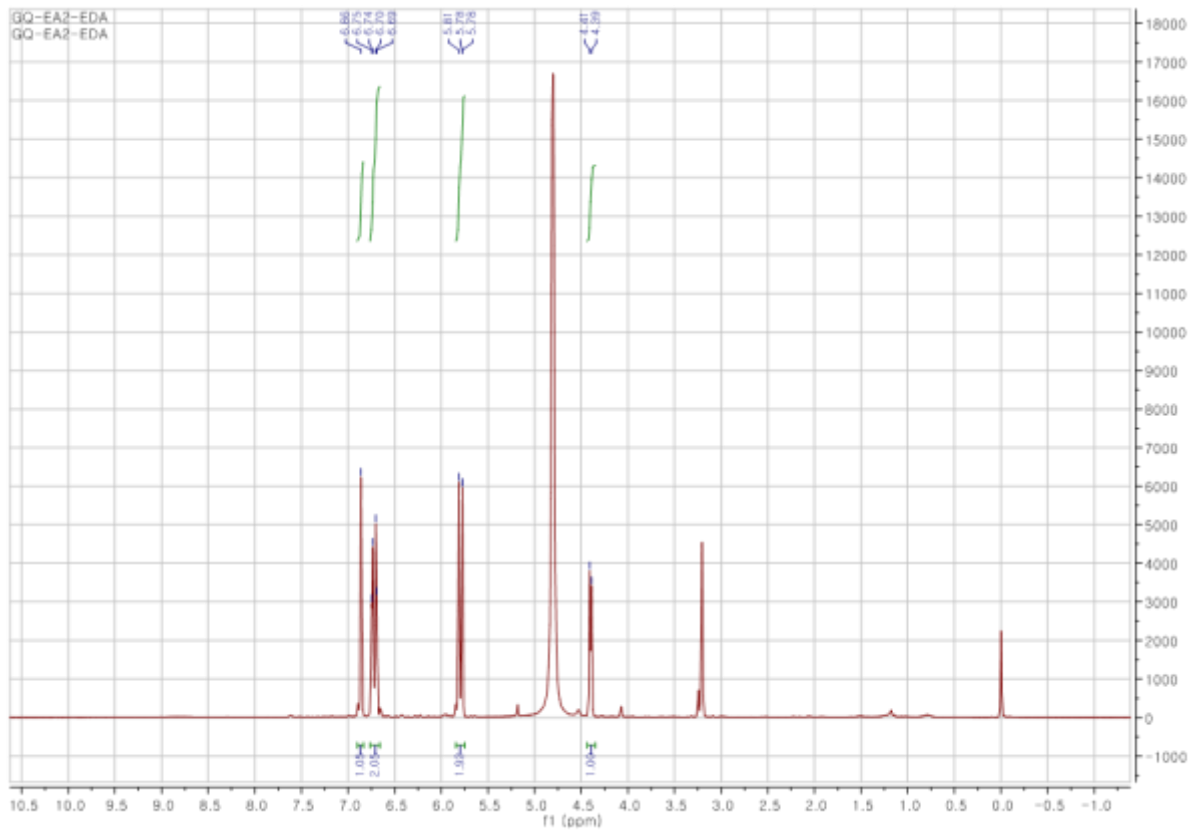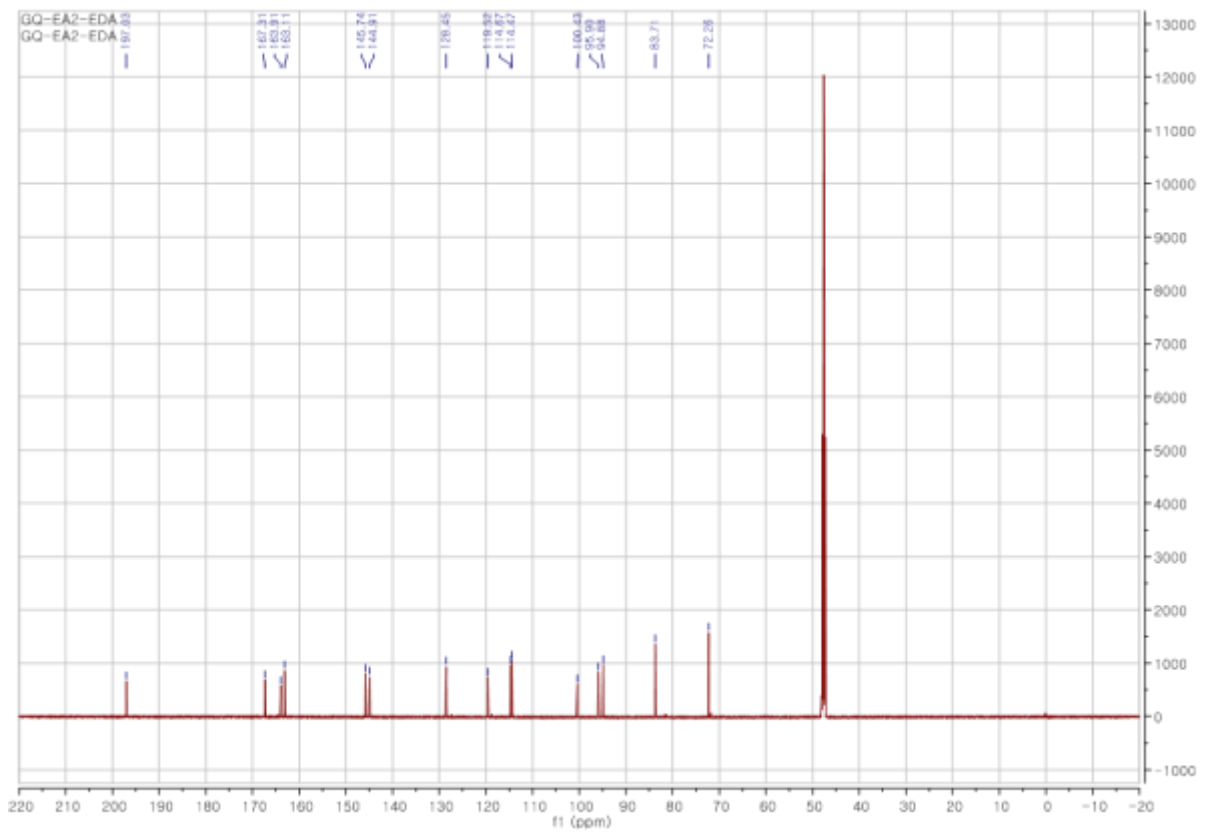

S5.  $^1\text{H}$  and  $^{13}\text{C}$  NMR spectrum of compound **4** in methanol- $d_4$  (600 and 150 MHz)

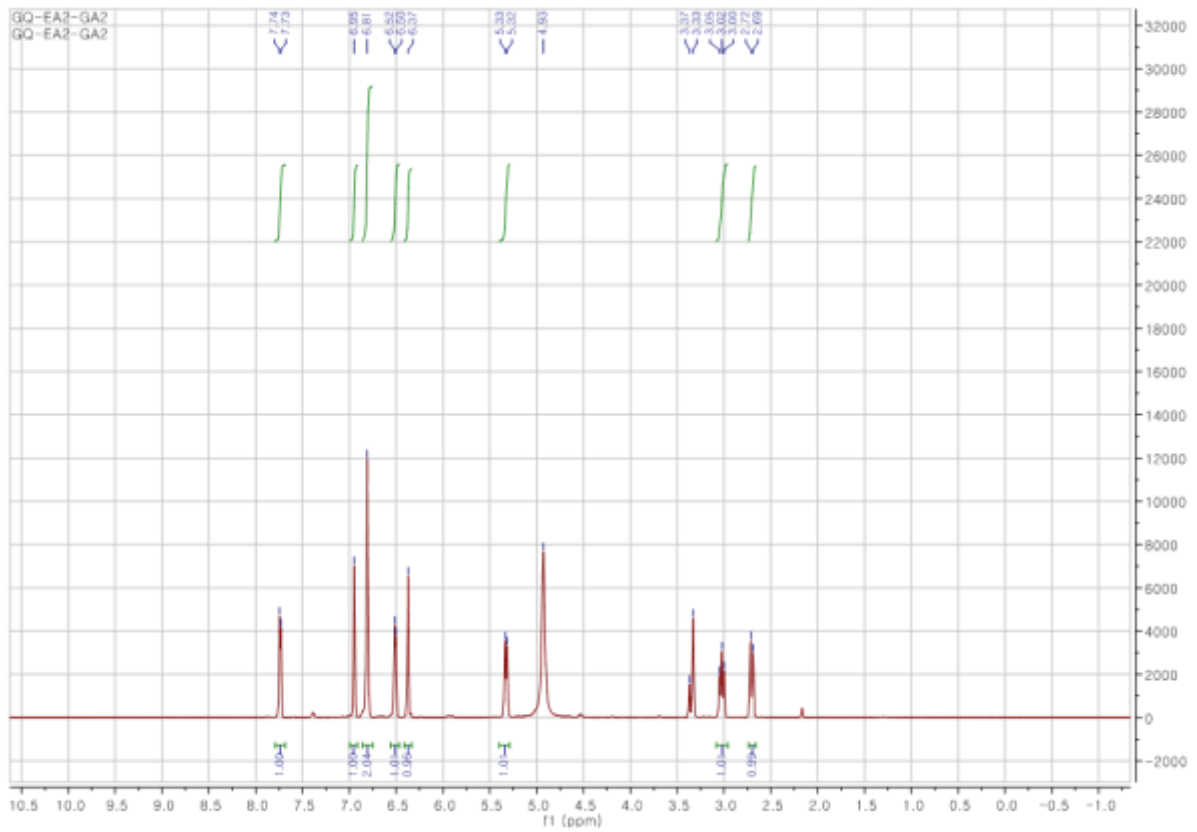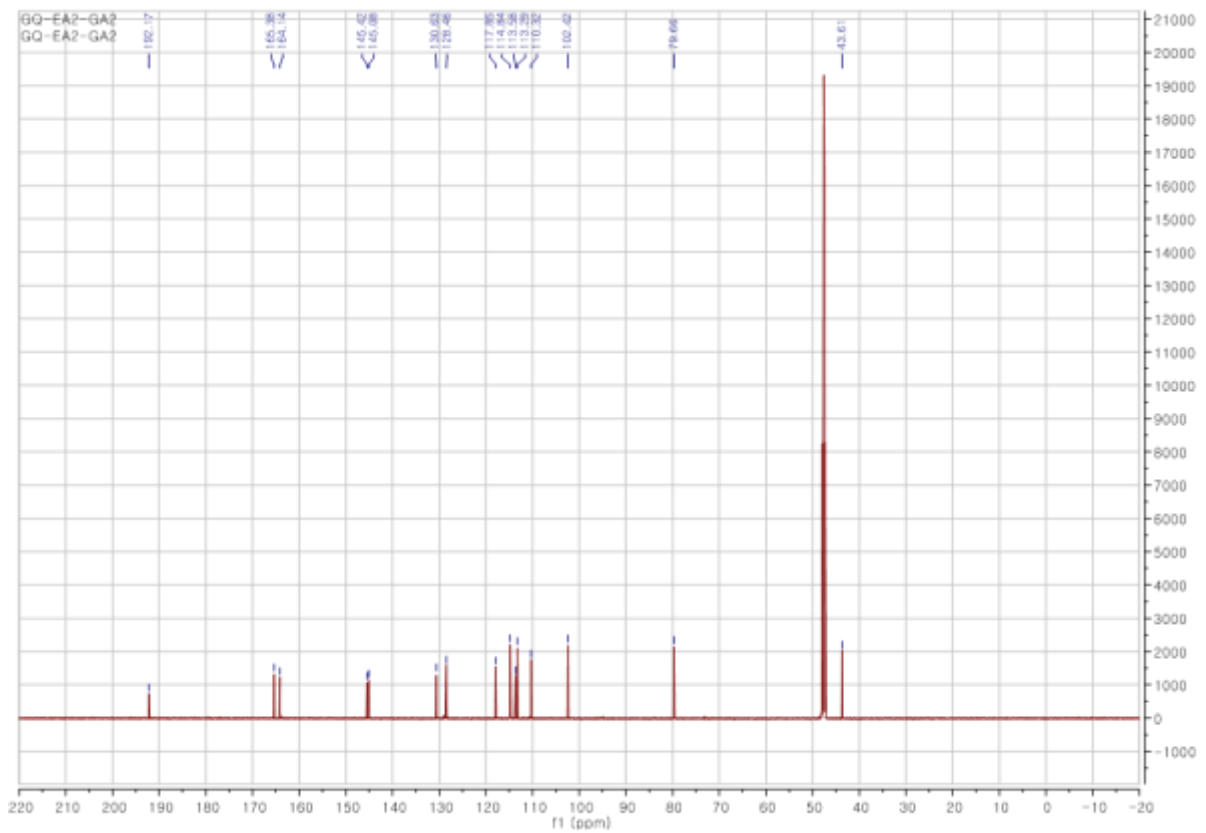

**S6.**  $^1\text{H}$  and  $^{13}\text{C}$  NMR spectrum of compound **5** in methanol- $d_4$  (600 and 150 MHz)



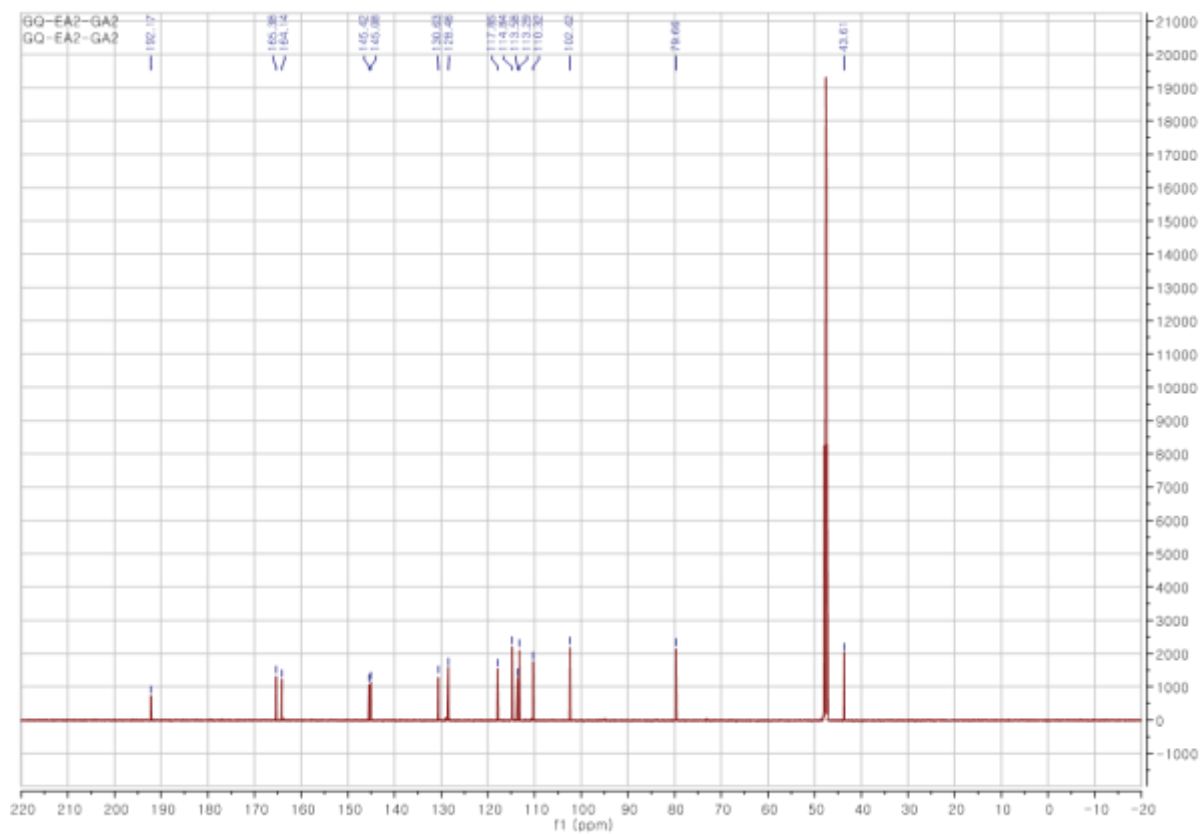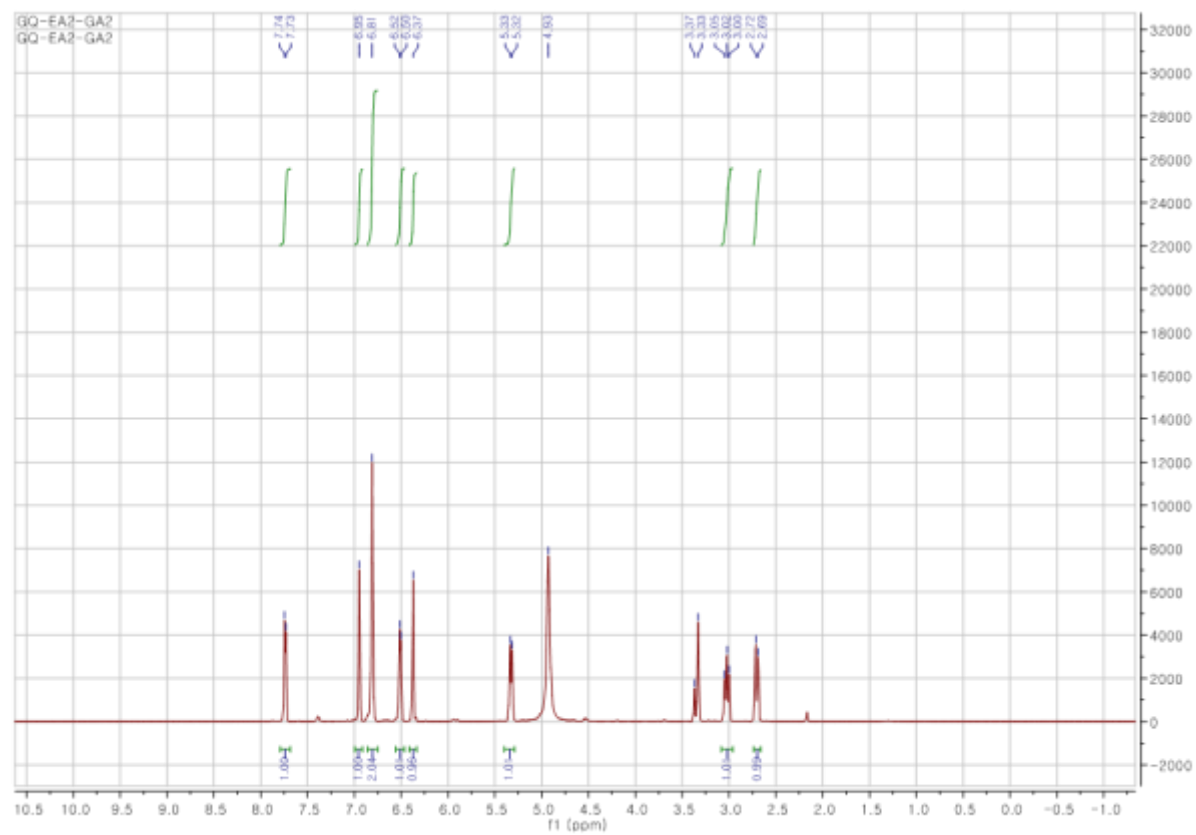

**S7.** <sup>1</sup>H and <sup>13</sup>C NMR spectrum of compound **6** in methanol-*d*<sub>4</sub> (600 and 150 MHz)

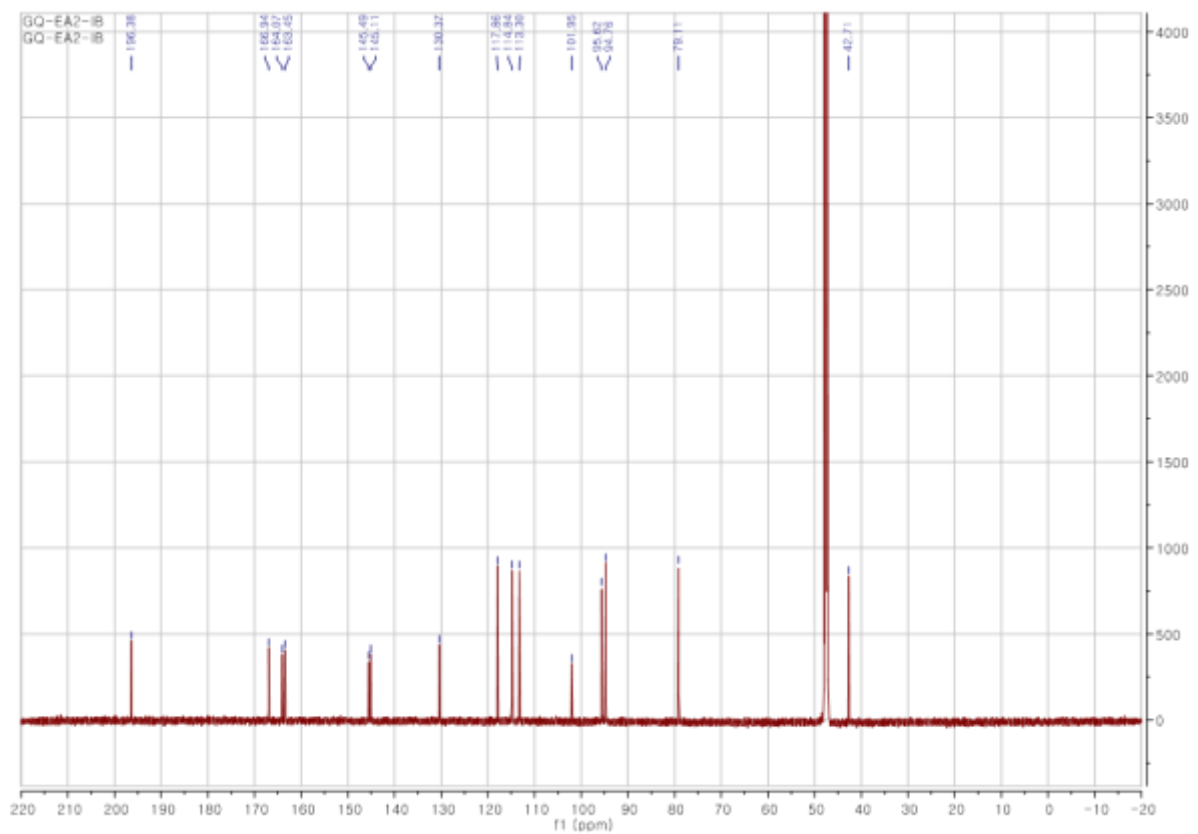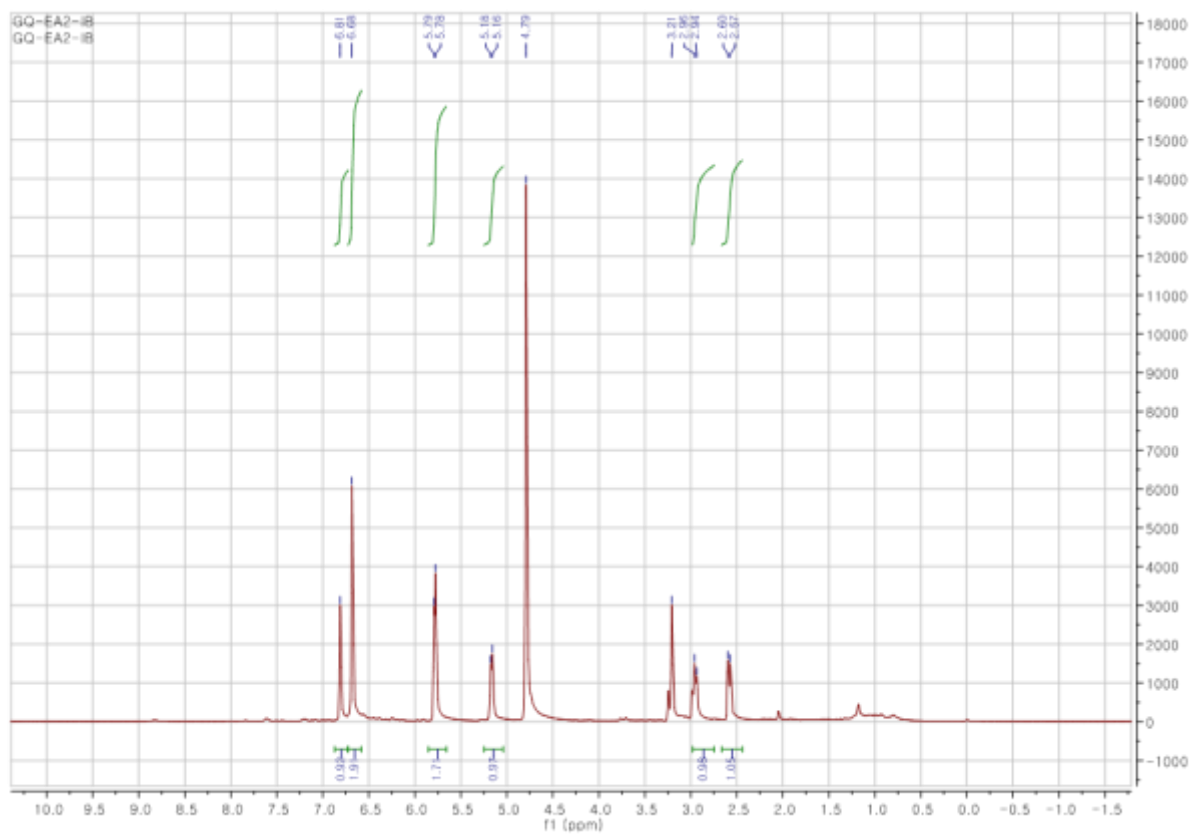

**S8.** <sup>1</sup>H and <sup>13</sup>C NMR spectrum of compound **7** in methanol-*d*<sub>4</sub> (600 and 150 MHz)

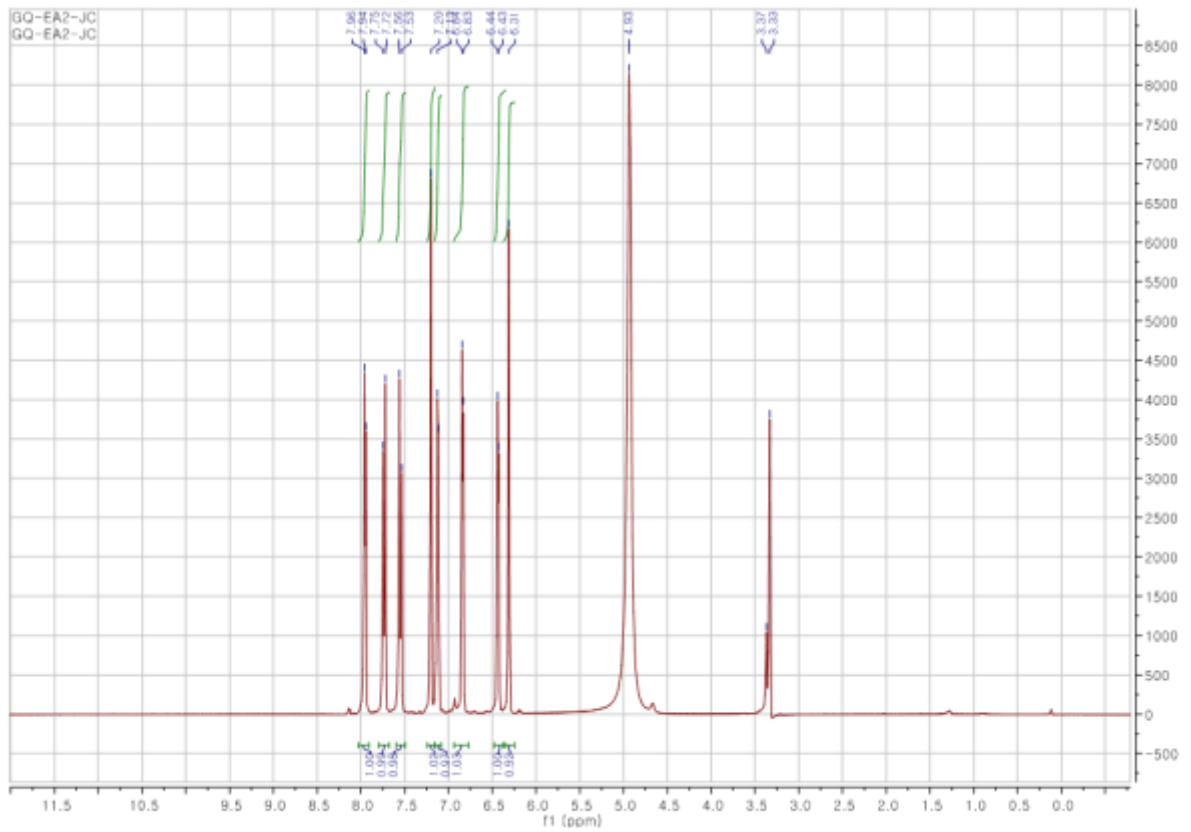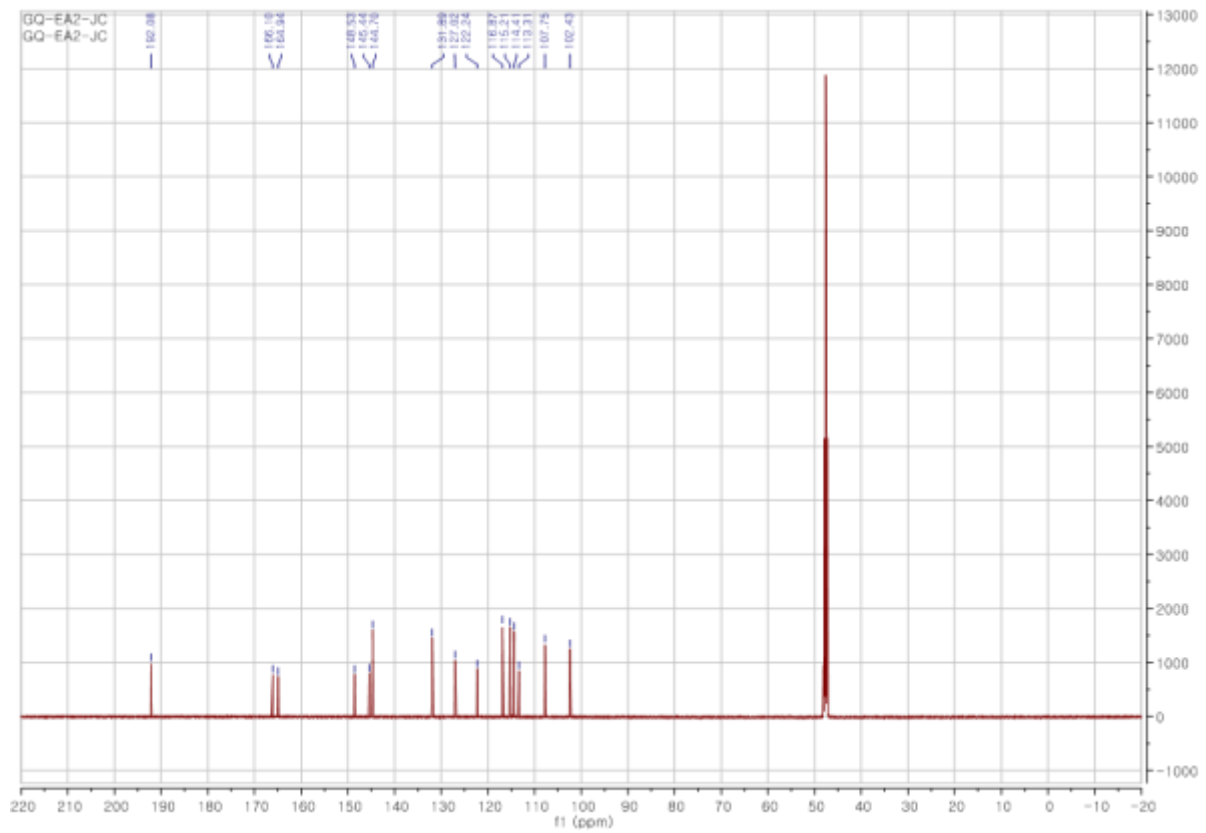

S9.  $^1\text{H}$  and  $^{13}\text{C}$  NMR spectrum of compound **8** in methanol- $d_4$  (600 and 150 MHz)

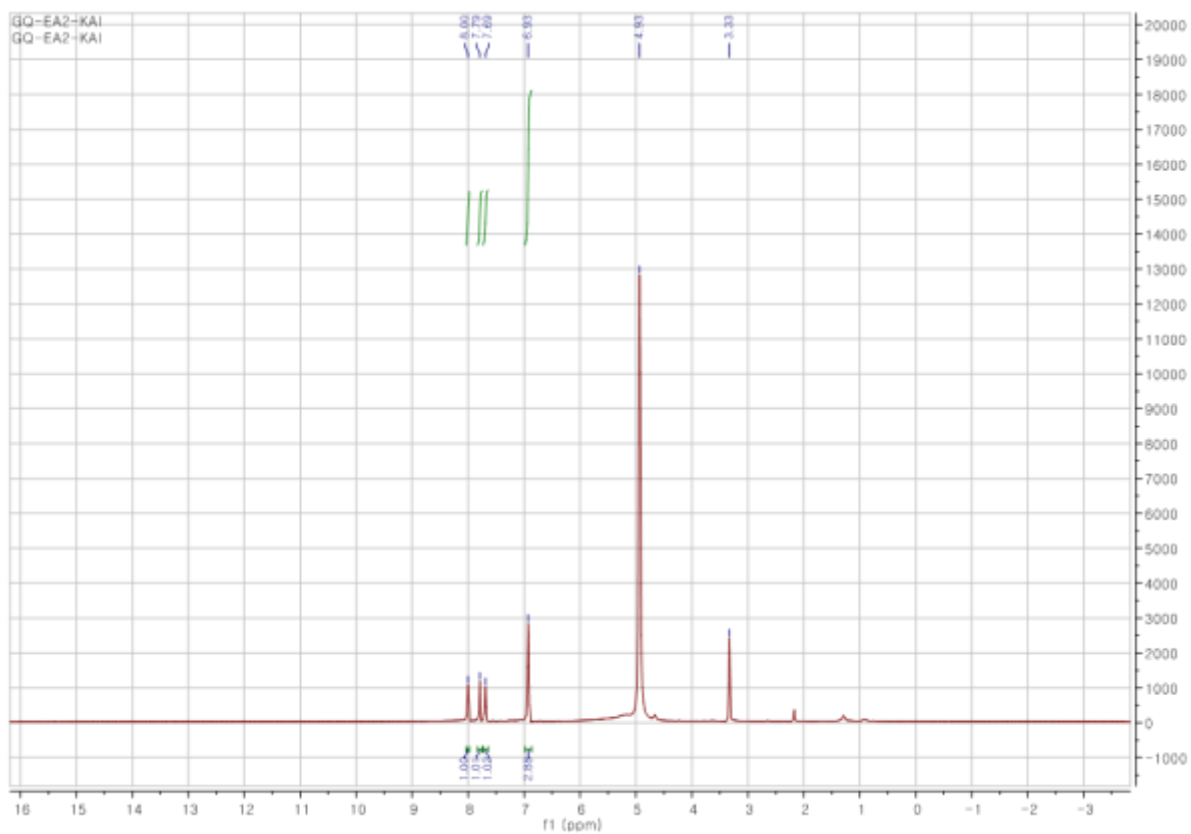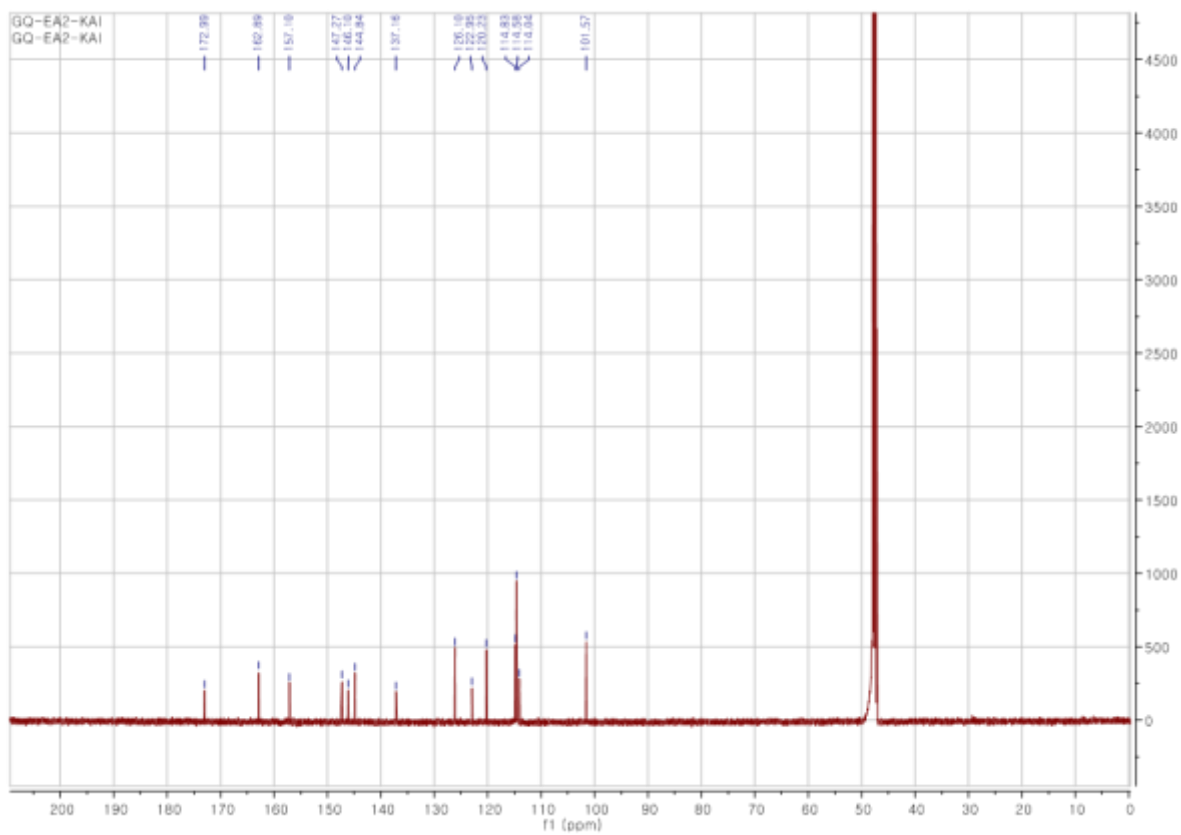

**S10.**  $^1\text{H}$  and  $^{13}\text{C}$  NMR spectrum of compound **9** in methanol- $d_4$  (600 and 150 MHz)

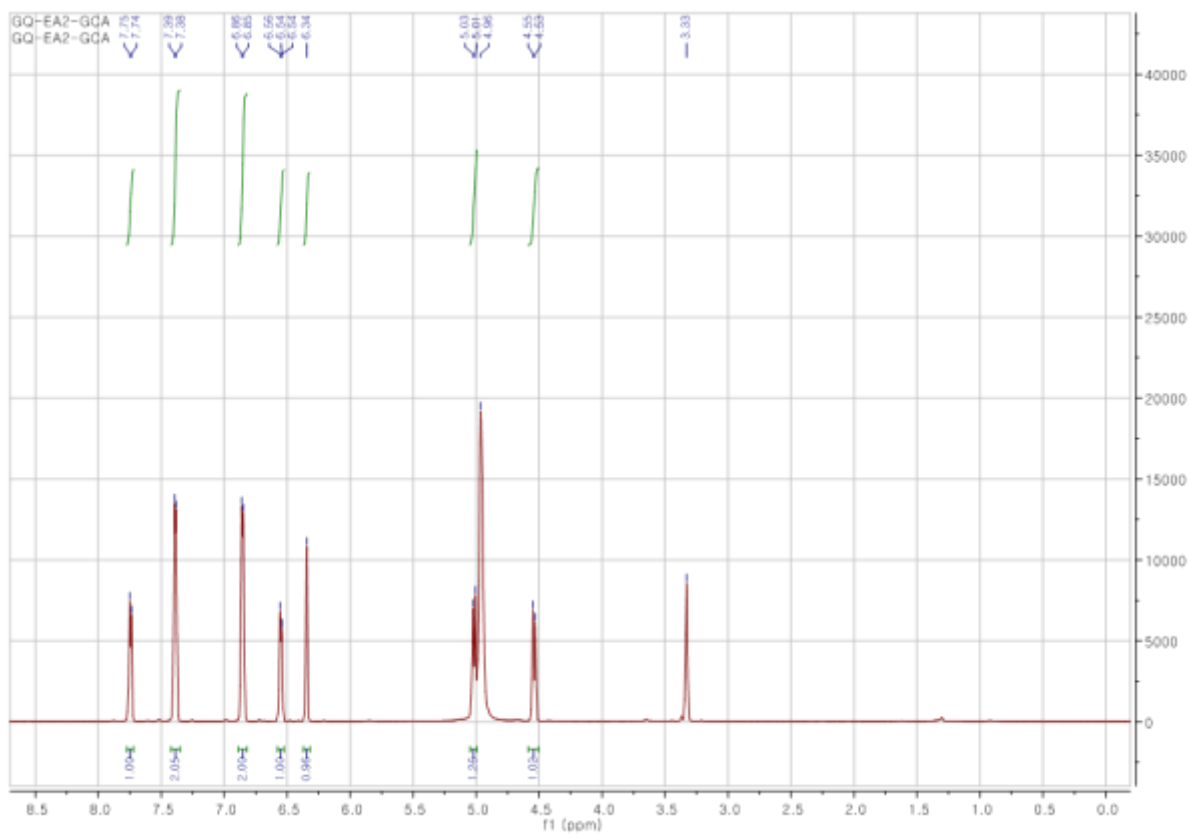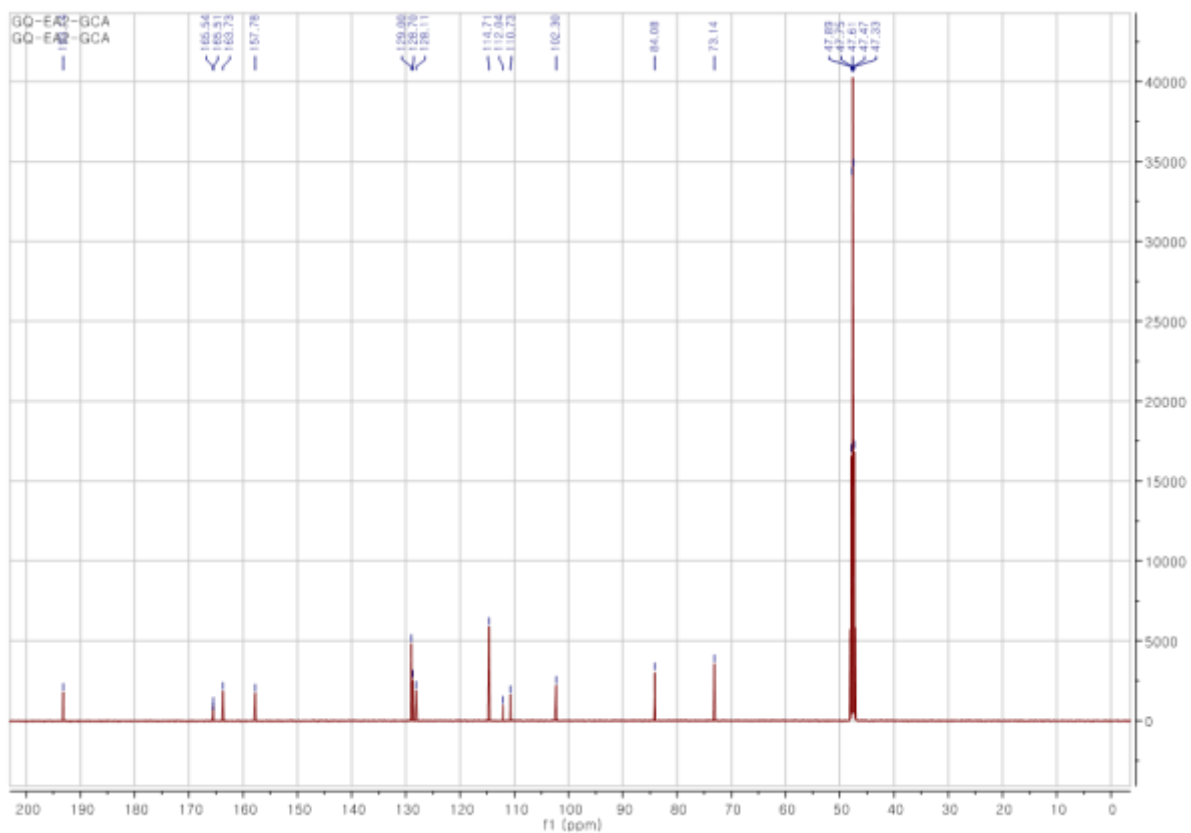

**S11.** <sup>1</sup>H and <sup>13</sup>C NMR spectrum of compound **10** in methanol-*d*<sub>4</sub> (600 and 150 MHz)

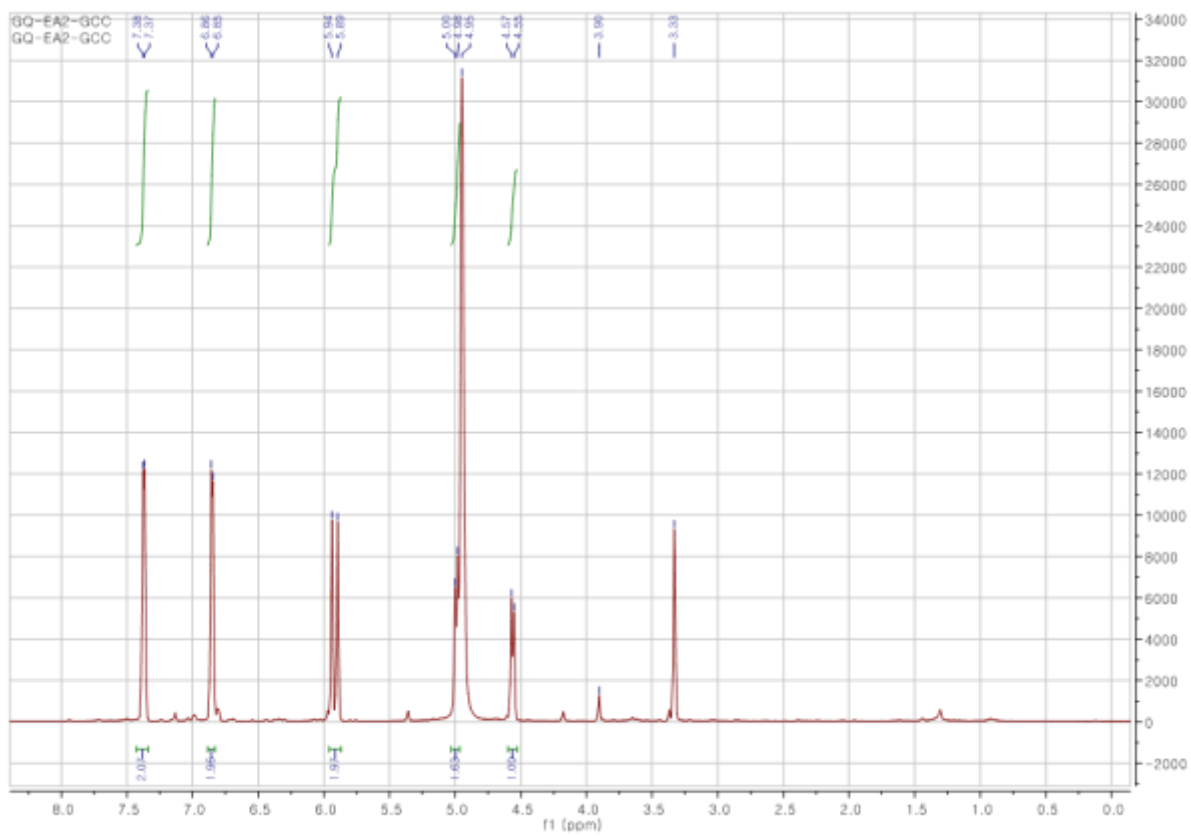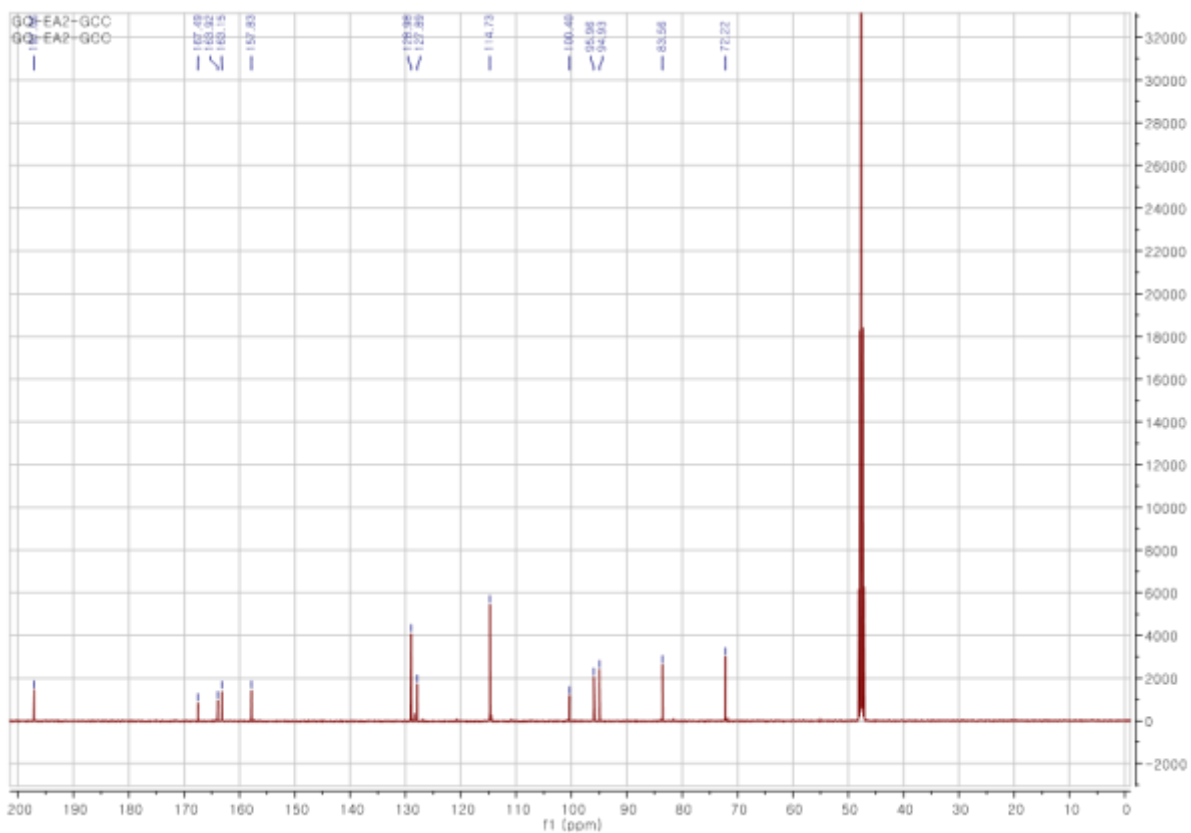

**S12.** <sup>1</sup>H and <sup>13</sup>C NMR spectrum of compound **11** in methanol-*d*<sub>4</sub> (600 and 150 MHz)

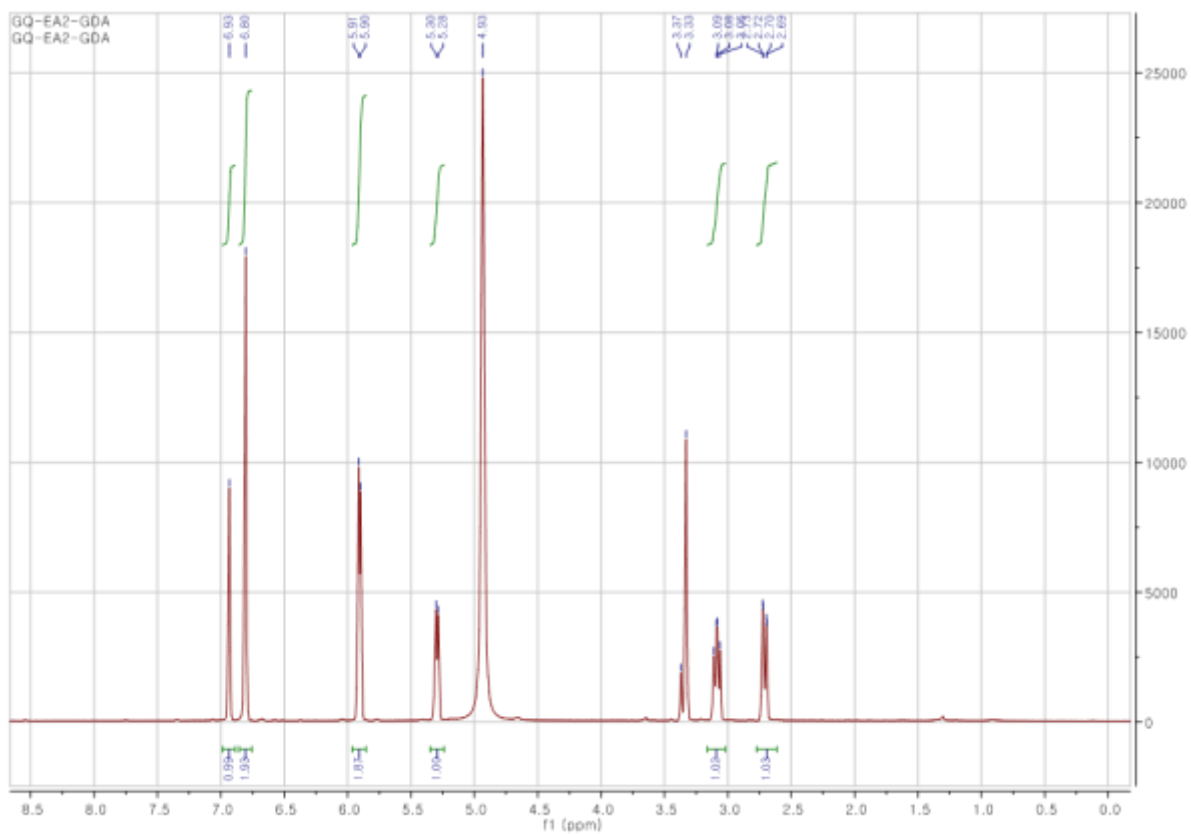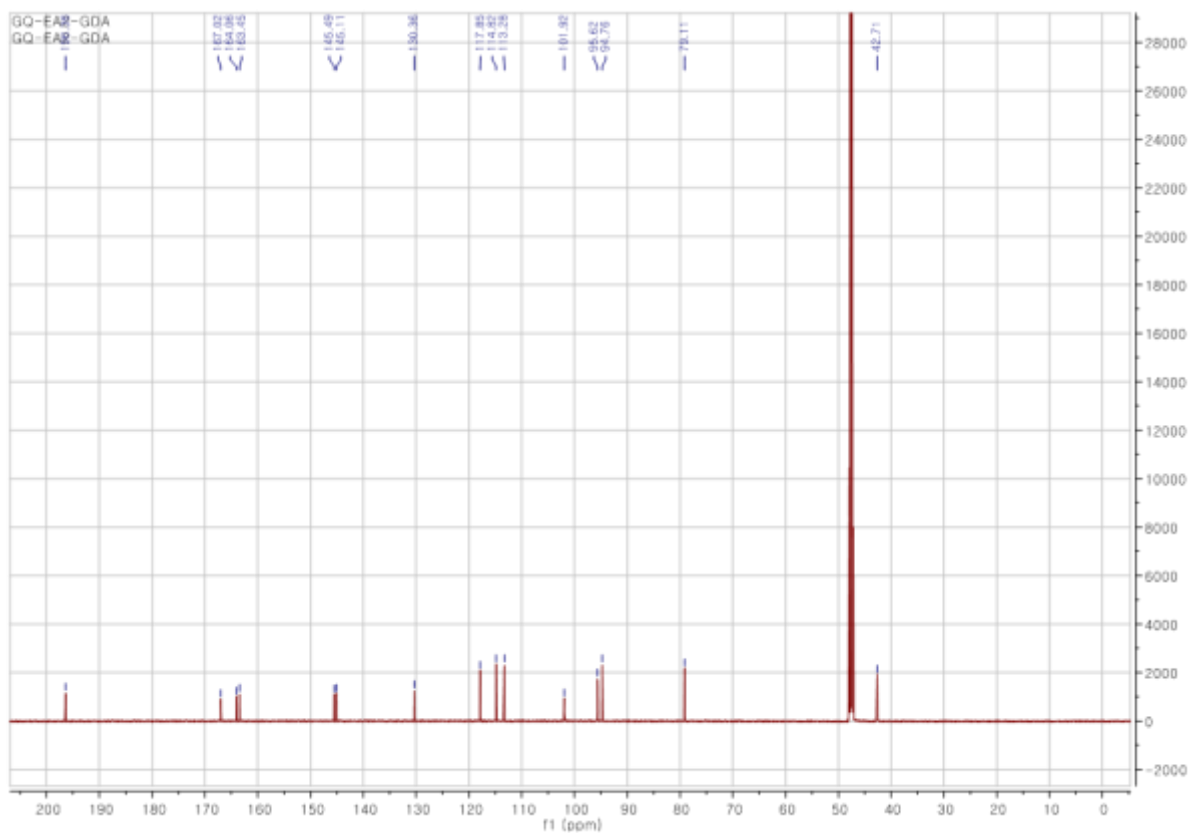

**S13.**  $^1\text{H}$  and  $^{13}\text{C}$  NMR spectrum of compound **12** in methanol- $d_4$  (600 and 150 MHz)

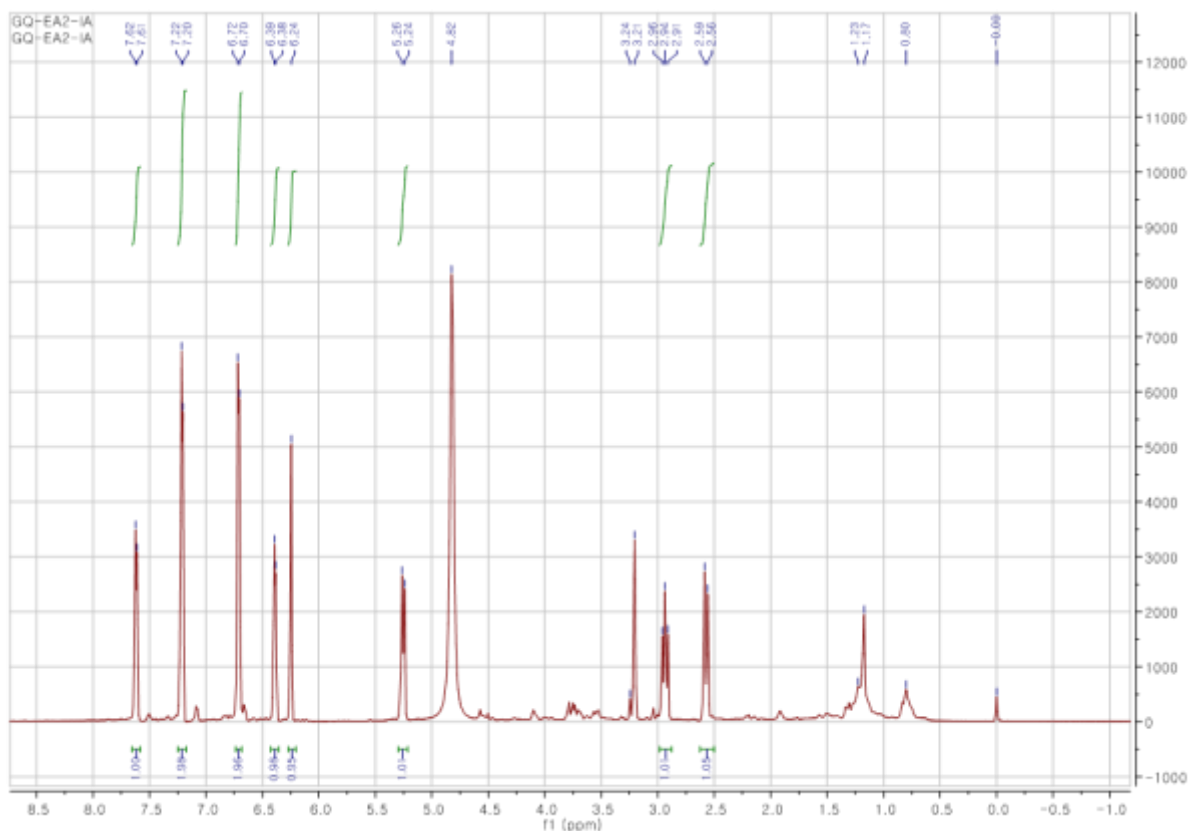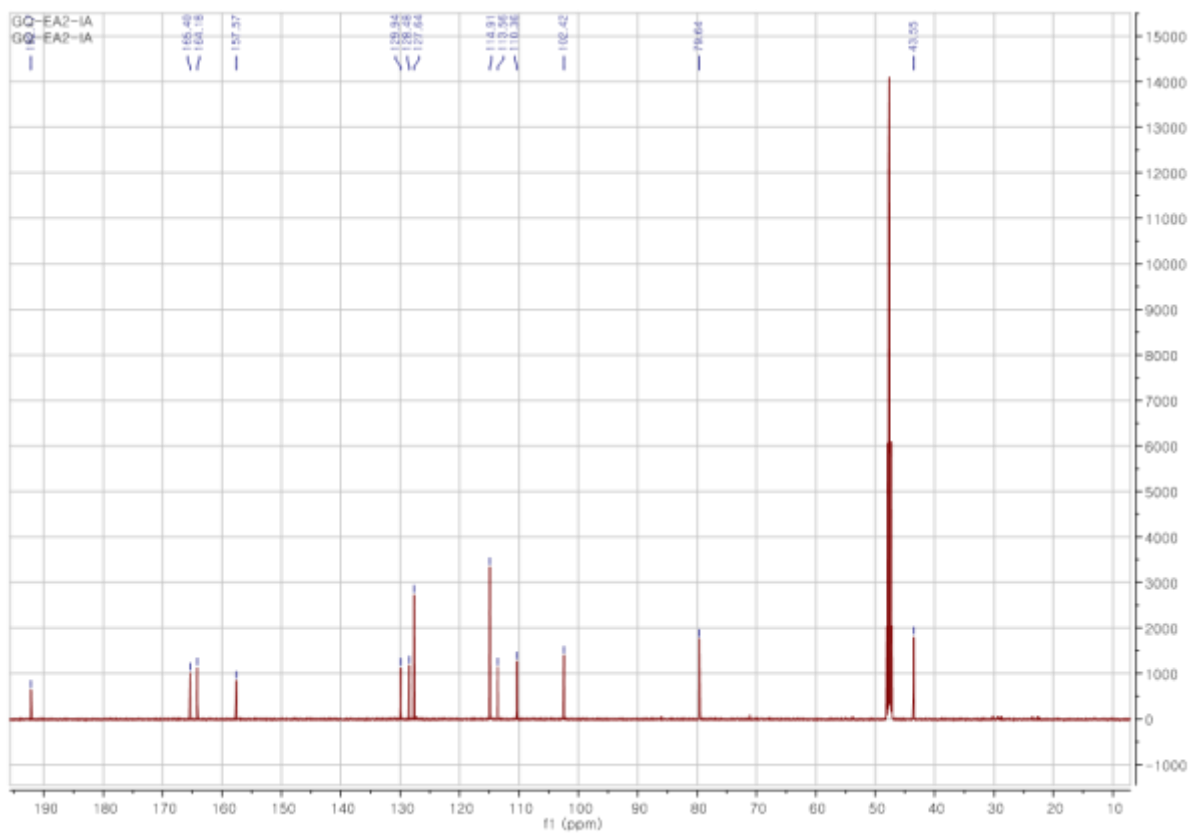

**S14.** <sup>1</sup>H and <sup>13</sup>C NMR spectrum of compound **13** in methanol-*d*<sub>4</sub> (600 and 150 MHz)



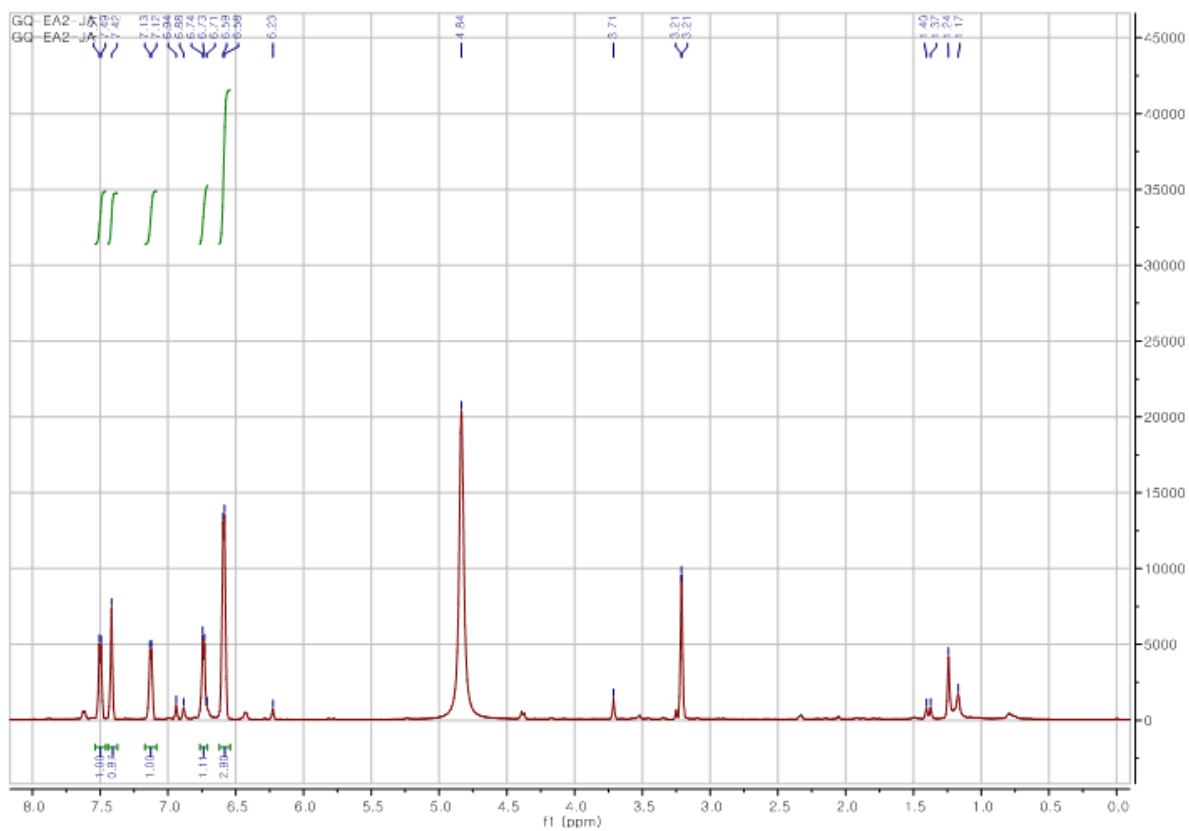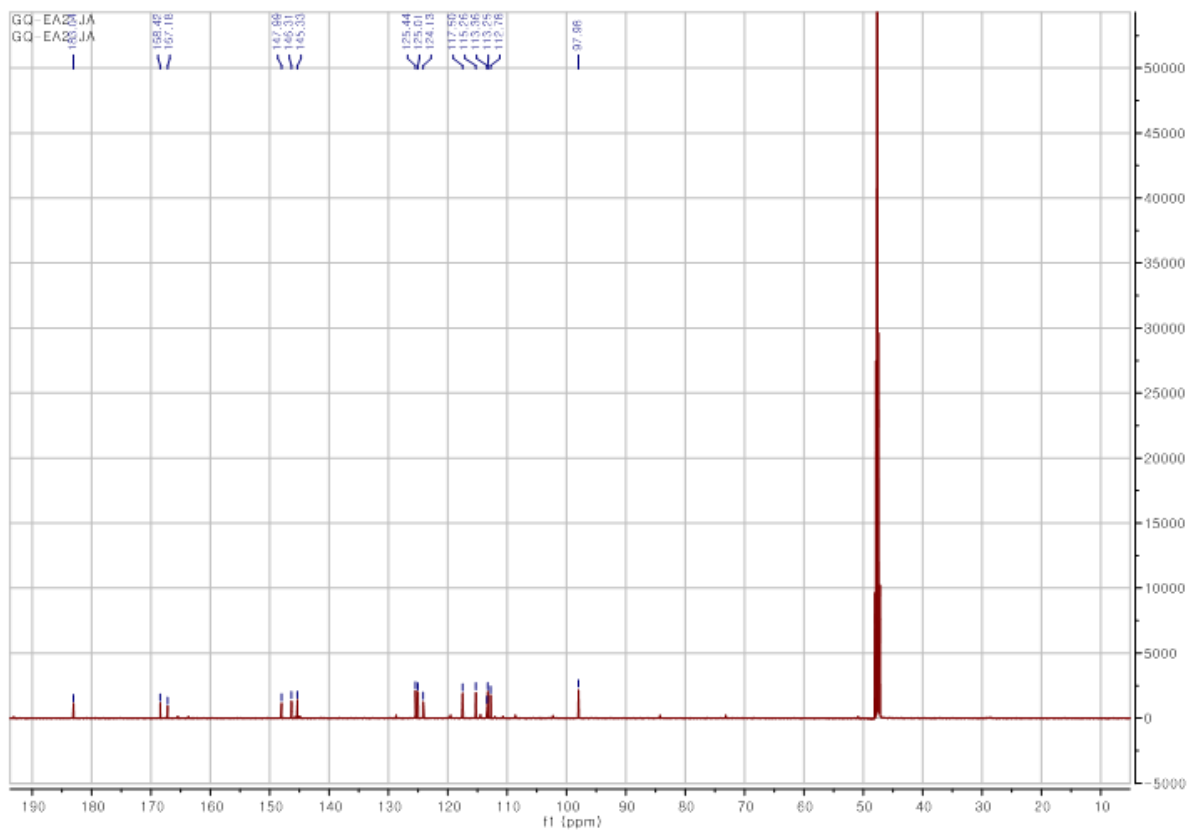

**S15.** <sup>1</sup>H and <sup>13</sup>C NMR spectrum of compound **14** in methanol-*d*<sub>4</sub> (600 and 150 MHz)

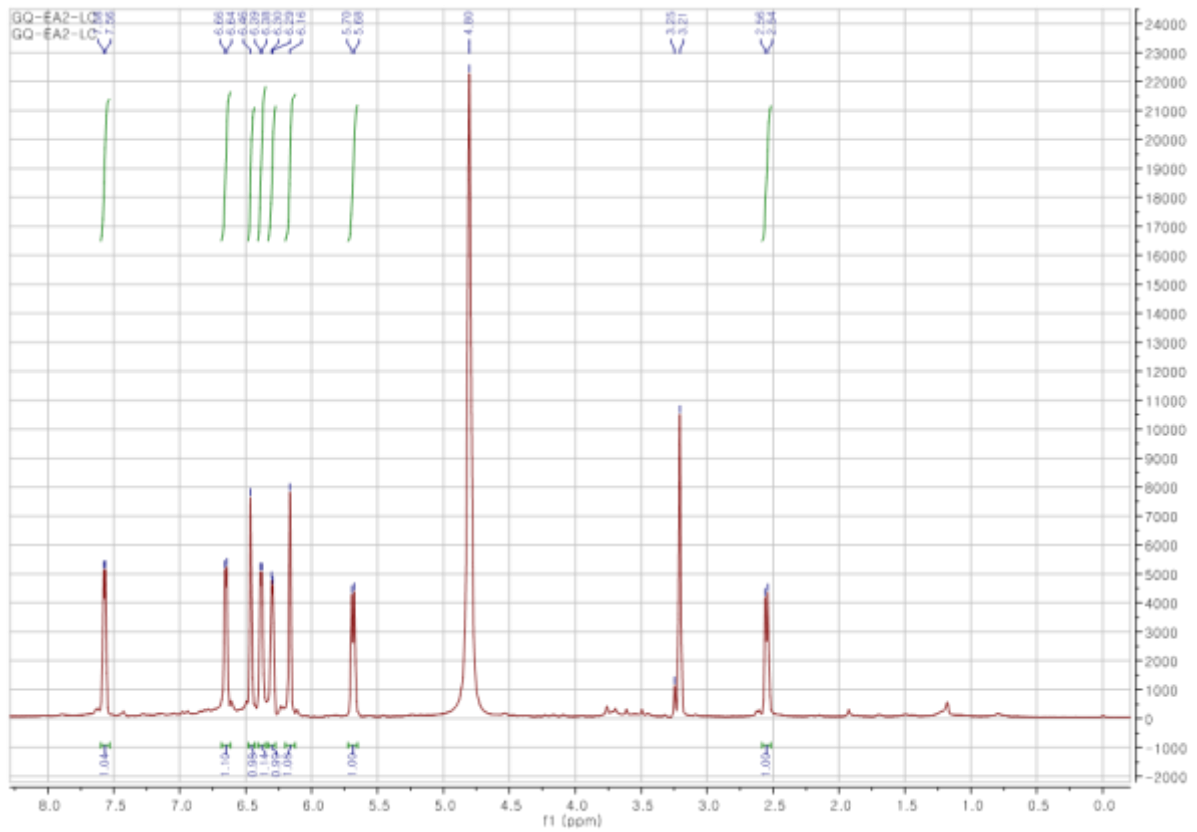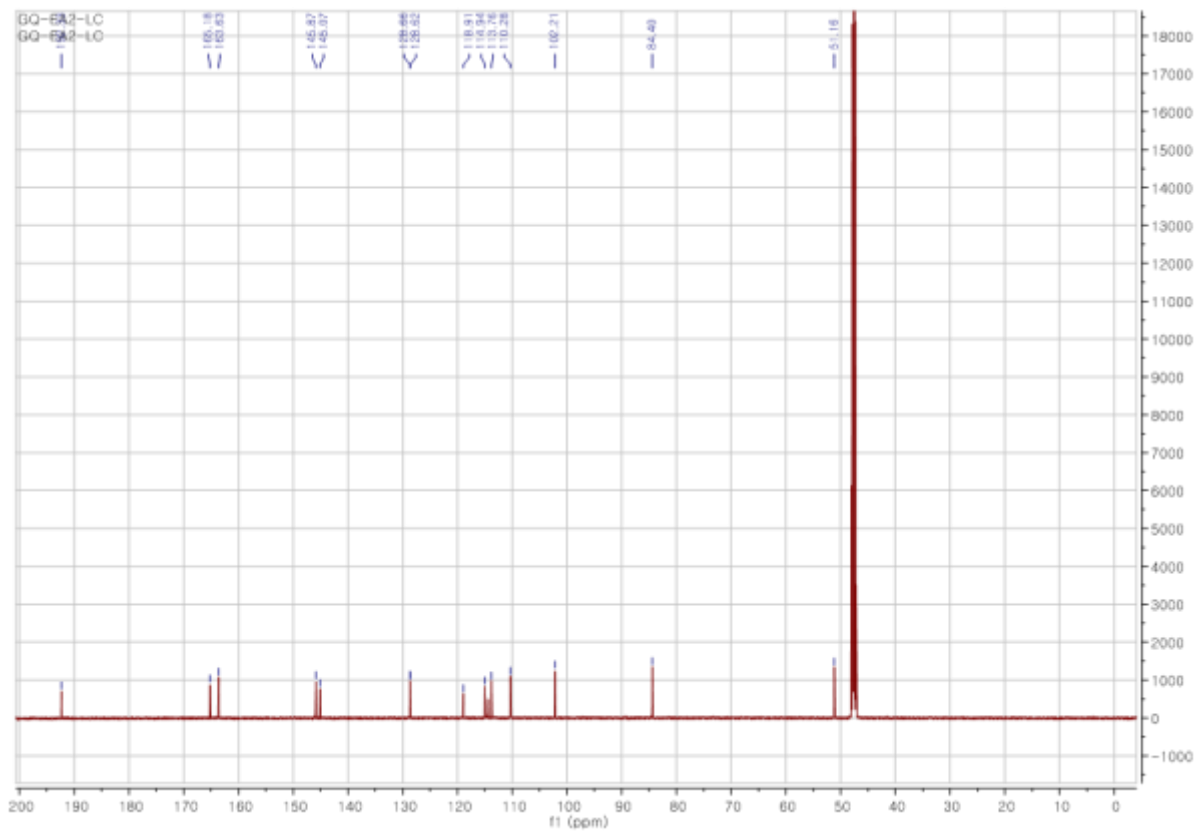

**S16.** <sup>1</sup>H and <sup>13</sup>C NMR spectrum of compound **15** in methanol-*d*<sub>4</sub> (600 and 150 MHz)

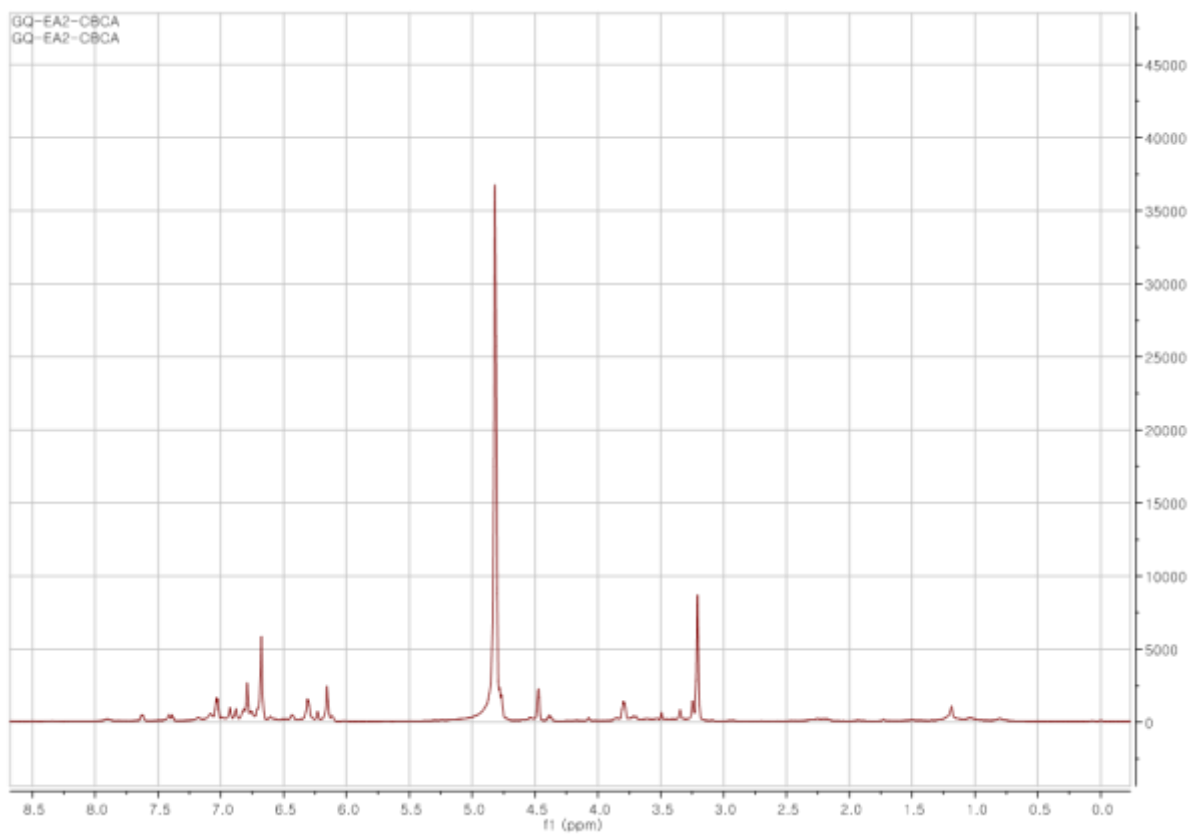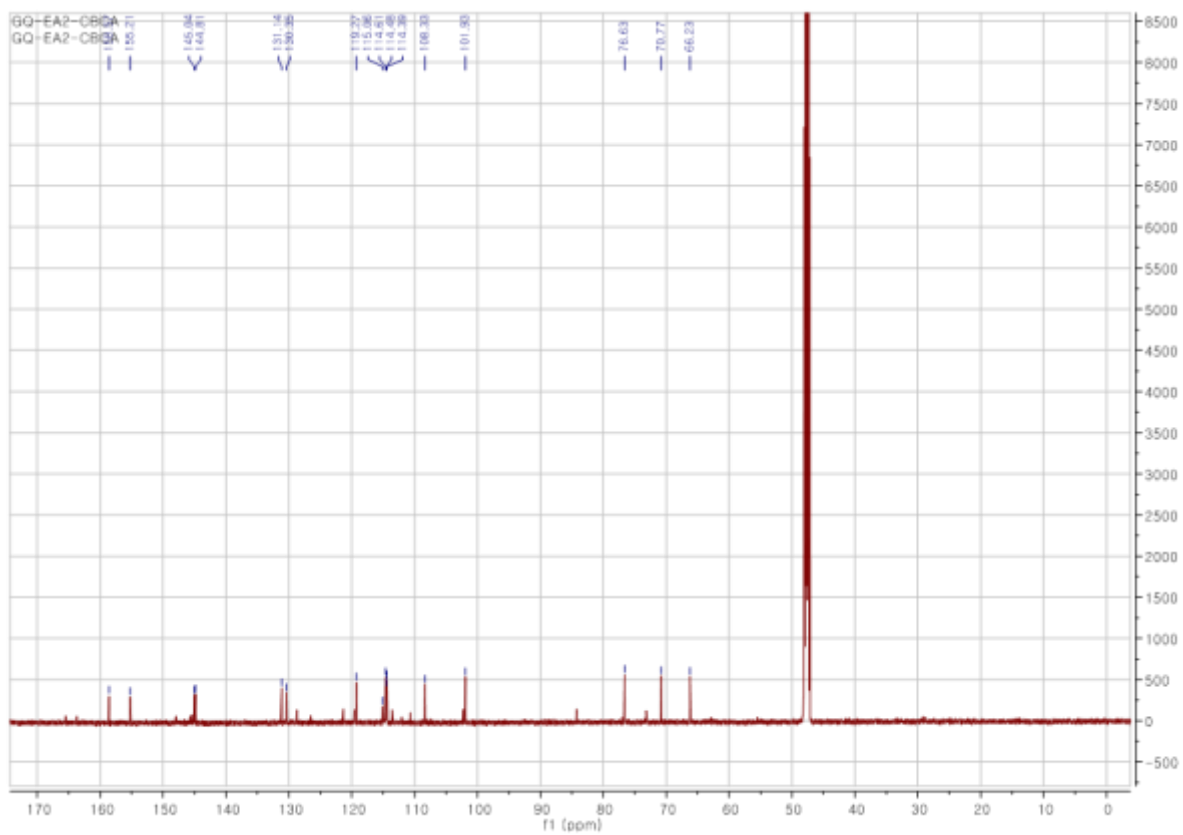

**S17.**  $^1\text{H}$  and  $^{13}\text{C}$  NMR spectrum of compound **16** in methanol- $d_4$  (600 and 150 MHz)

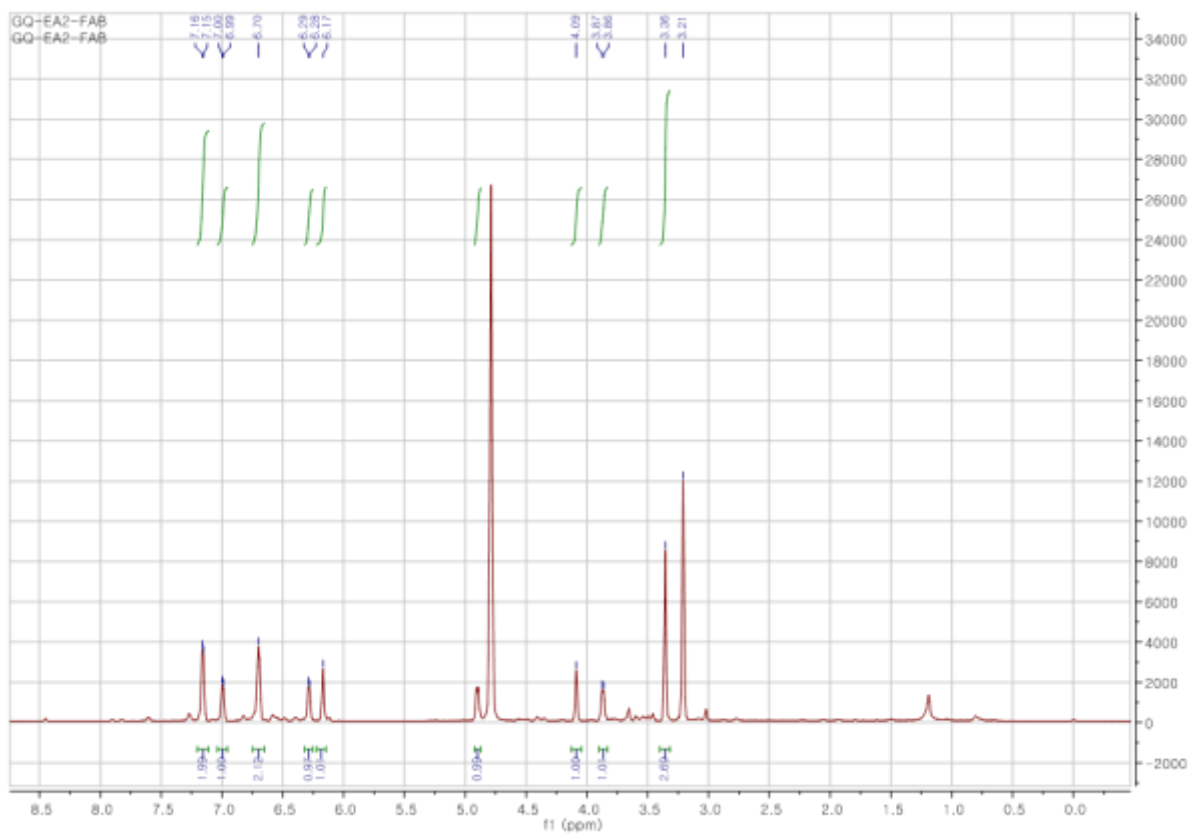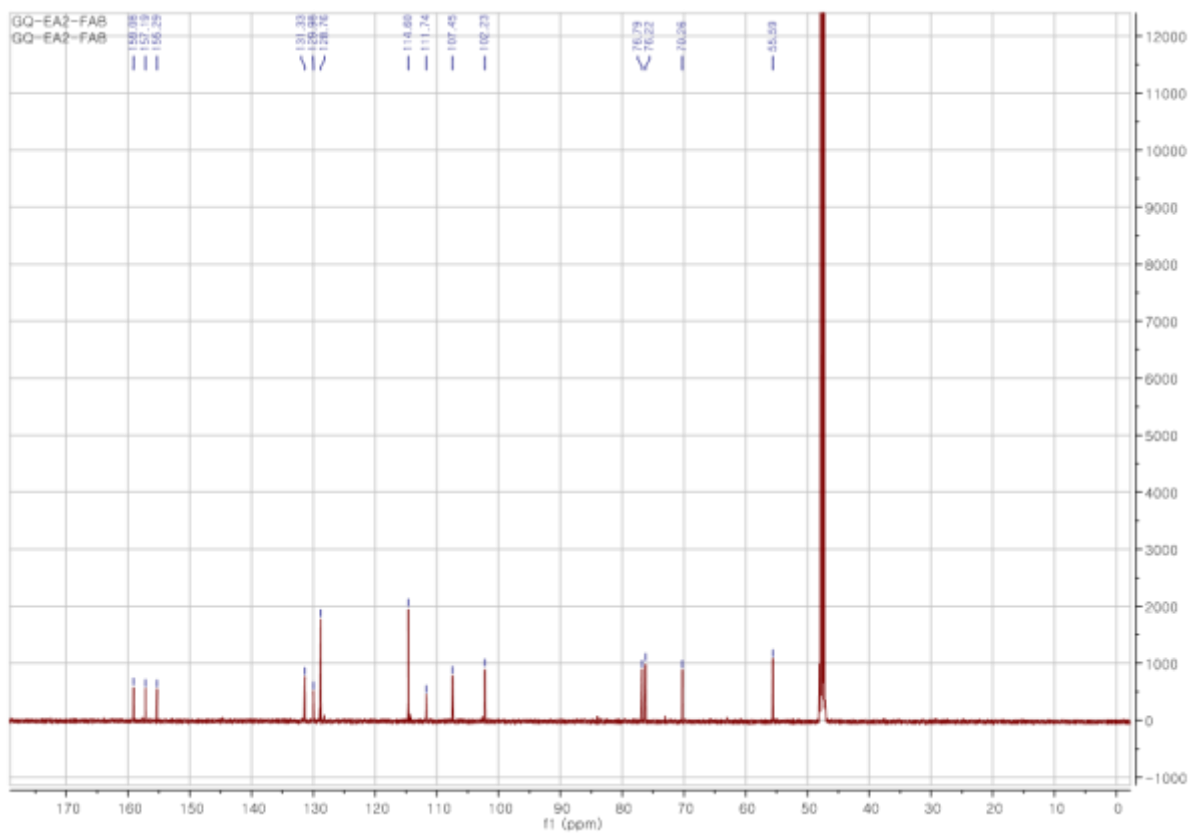

**S18.**  $^1\text{H}$  and  $^{13}\text{C}$  NMR spectrum of compound **17** in methanol- $d_4$  (600 and 150 MHz)

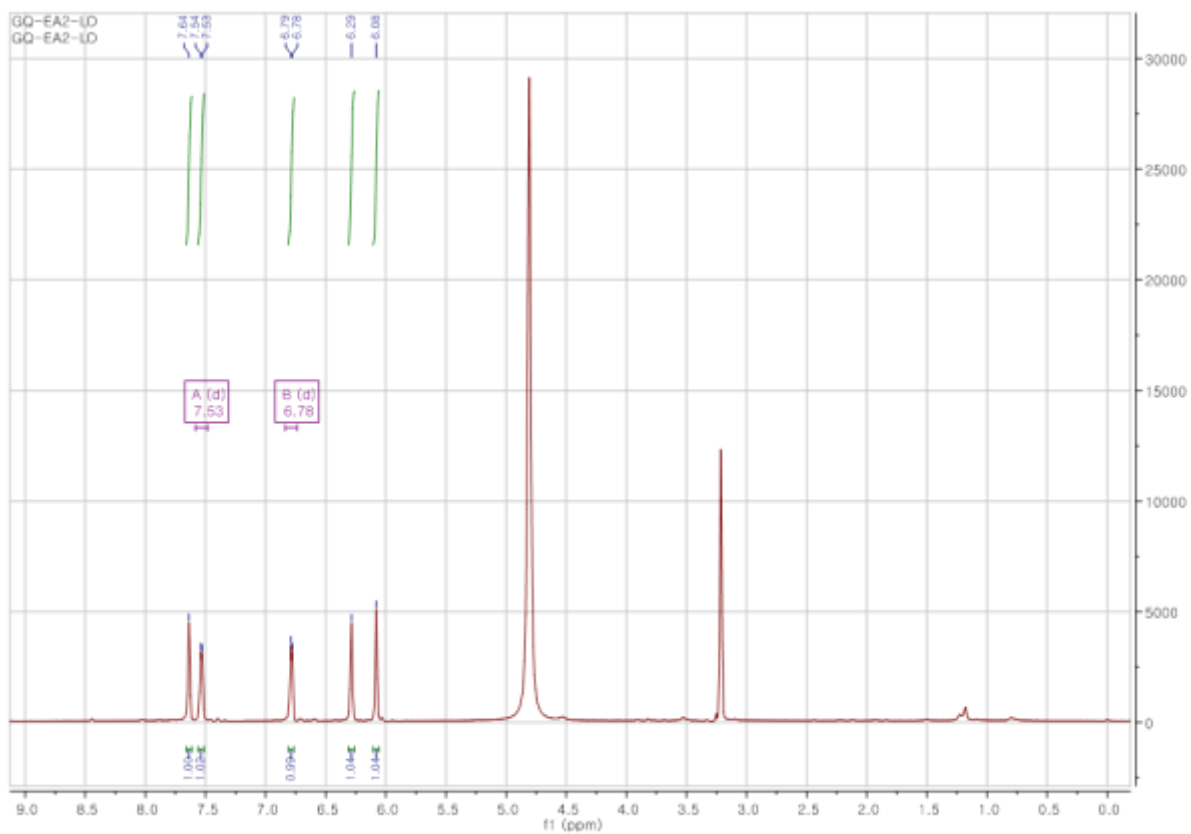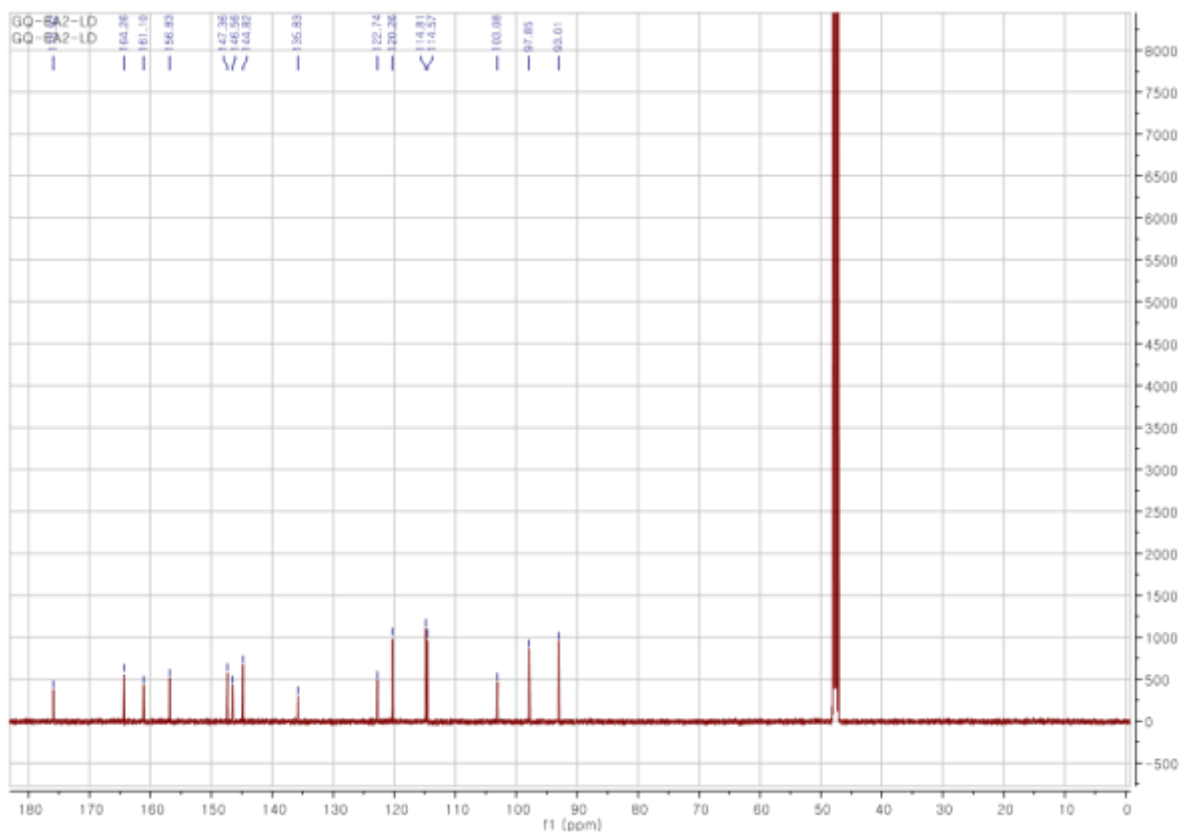

**S19.** <sup>1</sup>H and <sup>13</sup>C NMR spectrum of compound **18** in methanol-*d*<sub>4</sub> (600 and 150 MHz)

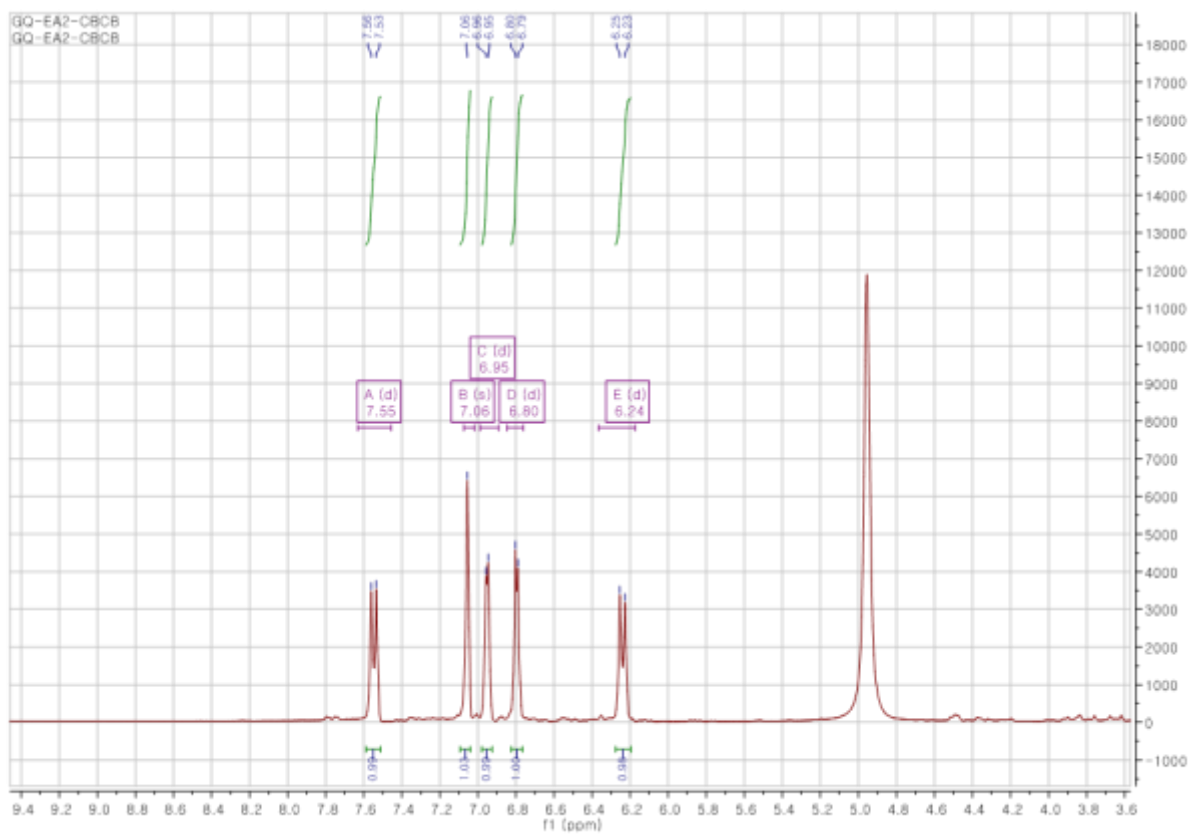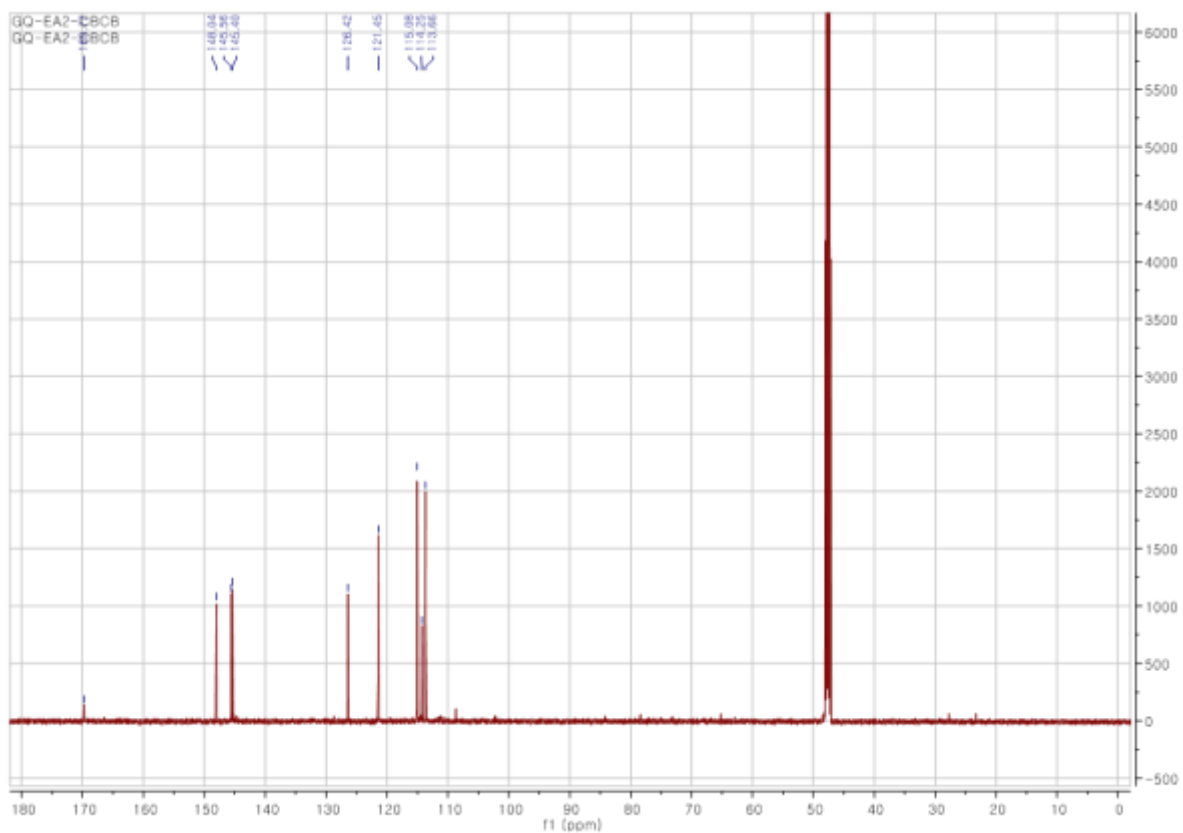

**S20.**  $^1\text{H}$  and  $^{13}\text{C}$  NMR spectrum of compound **19** in methanol- $d_4$  (600 and 150 MHz)

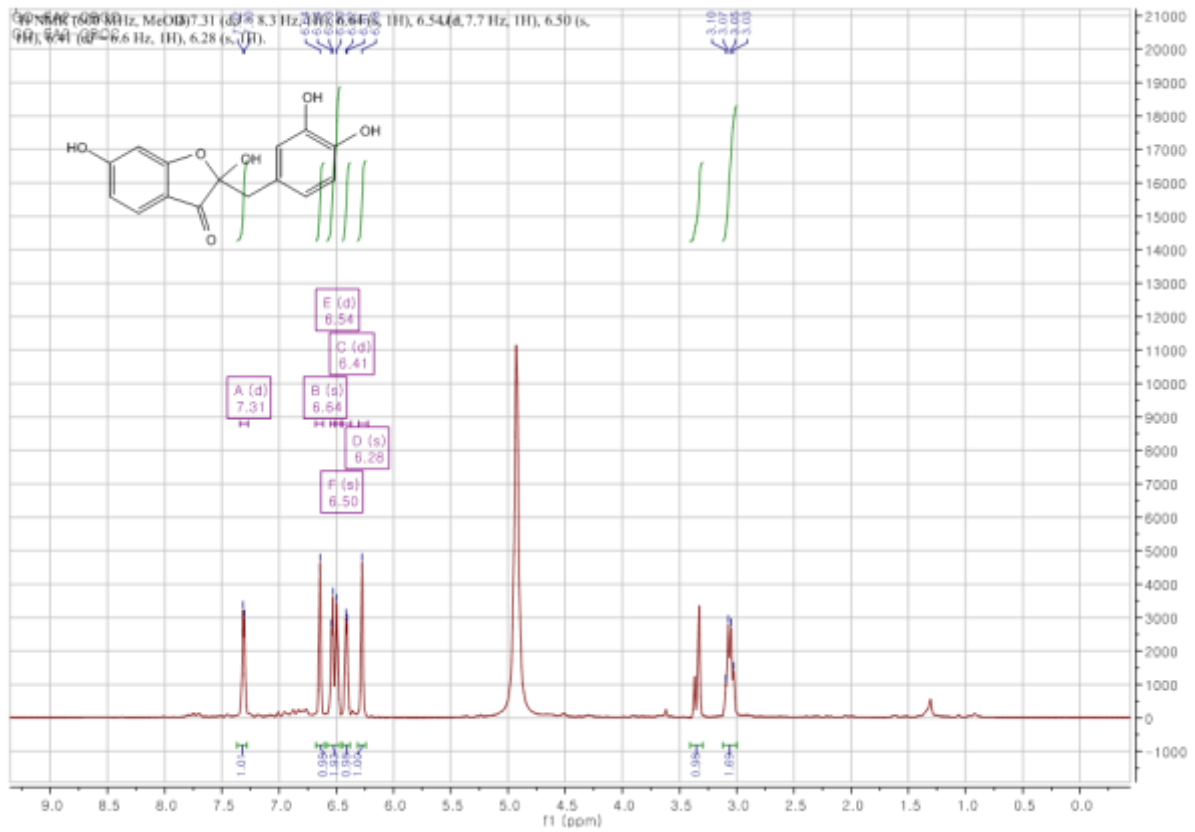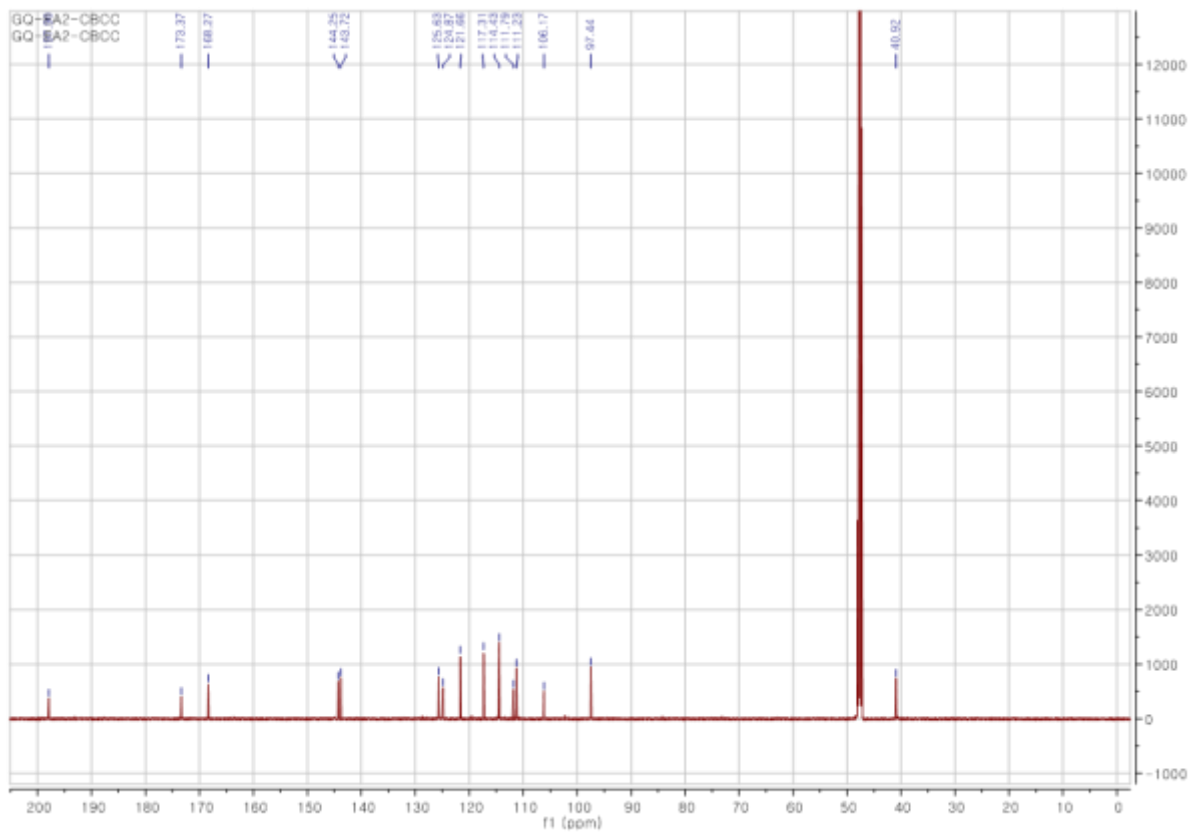

**S21.** <sup>1</sup>H and <sup>13</sup>C NMR spectrum of compound **20** in methanol-*d*<sub>4</sub> (600 and 150 MHz)

## PD-1/PD-L1

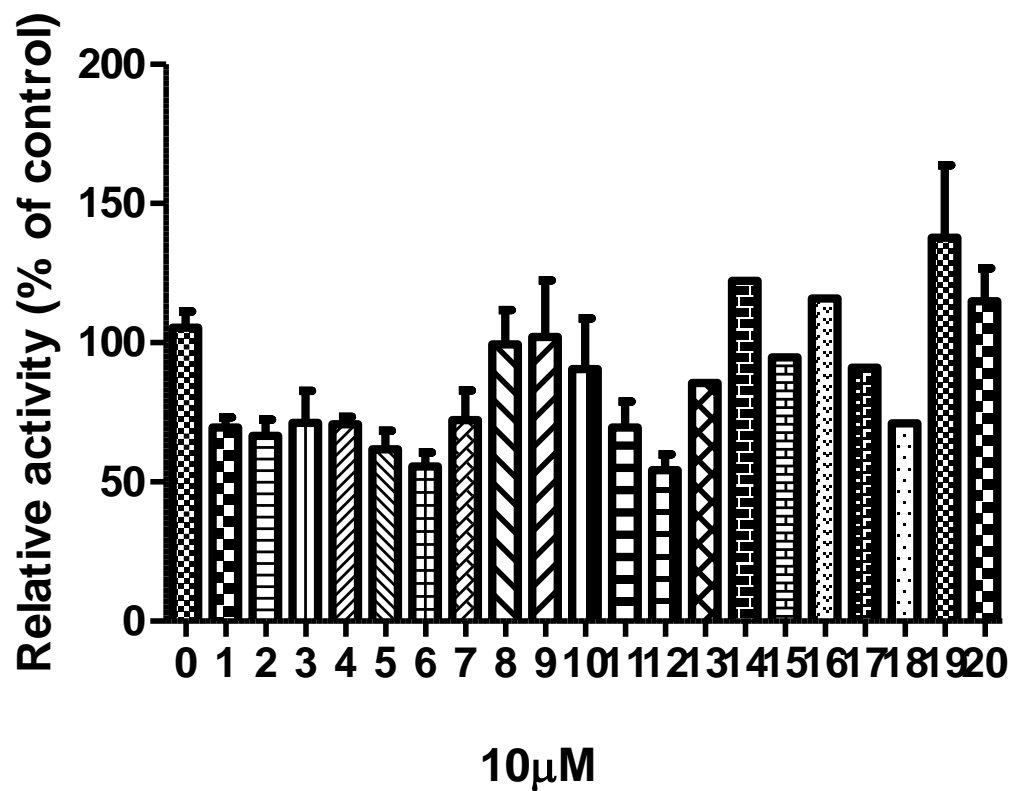

S22. Blocking effect of PD-1/PD-L1 interaction of isolated compound 1–20 at 10 $\mu$ M.



### CTLA4/CD80

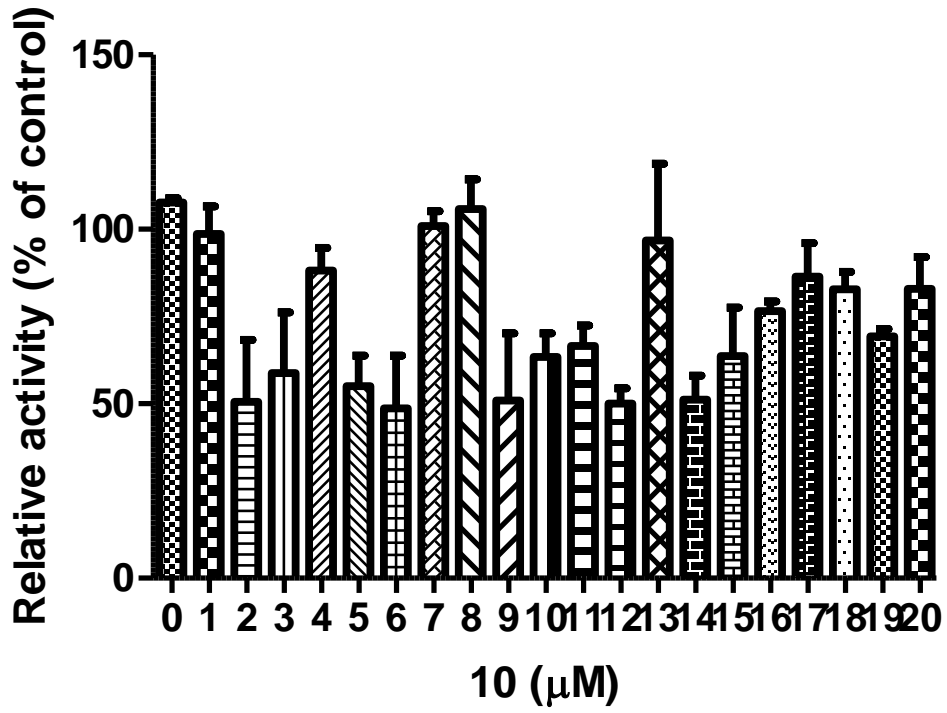

S23. Blocking effect of CTLA4/CD80 interaction of isolated compound 1–20 at 10 $\mu\text{M}$ .
